# Supplementary material for: Pathogenic Single Nucleotide Polymorphisms on Autophagy-Related Genes
Source: Int J Mol Sci. 2020 Nov 2;21(21):8196. doi: 10.3390/ijms21218196 (PMC7672651; doi:10.3390/ijms21218196)
Supplement: Supplementary file 1 [file ijms-21-08196-s001.xlsx]

## Sheet: Hoja1
Gene	Stage of Autohagy	Position	Change	Gene consequence	Disease	Ref	dbSNP rsid
AMBRA1	Membrane nucleation	chr11:46539130 (GRCh38.p12)	C>T	AMBRA1 : Intron Variant	Schizophrenia	21747397	rs11819869
AMBRA1	Membrane nucleation	chr11:46401136 (GRCh38.p12)	C>A	AMBRA1 : Intron Variant	Schizophrenia	21747397	rs12574668
AMBRA1	Membrane nucleation	chr11:46527204 (GRCh38.p12)	C>G	AMBRA1 : Intron Variant	Schizophrenia	28991256	rs61882743
AMBRA1	Membrane nucleation	chr11:46491699 (GRCh38.p12)	C>T	AMBRA1 : Intron Variant	Schizophrenia	21747397	rs7112229
AMBRA1	Membrane nucleation	chr11:46478324 (GRCh38.p12)	C>T	AMBRA1 : Intron Variant	Schizophrenia	21747397	rs7130141
AMBRA1	Membrane nucleation	chr11:46512996 (GRCh38.p12)	A>G	AMBRA1 : Intron Variant	Autism	28994820	rs3802890
AMBRA1	Membrane nucleation	chr11:46328319 (GRCh38.p12)	T>C	Unknown	Selective immunoglobulin A deficiency	27723758	rs4565870
ARSB	Lysosomal degradation	chr5:78969095 (GRCh38.p12)	C>A / C>T	ARSB : Missense Variant	Mucopolysaccharidosis type VI (Maroteaux-Lamy syndrome)	1718978	rs118203938
ARSB	Lysosomal degradation	chr5:78969156 (GRCh38.p12)	A>G	ARSB : Missense Variant	Mucopolysaccharidosis type VI (Maroteaux-Lamy syndrome)	1550123	rs118203939
ARSB	Lysosomal degradation	chr5:78955486 (GRCh38.p12)	A>G	ARSB : Missense Variant	Mucopolysaccharidosis type VI (Maroteaux-Lamy syndrome)	1550123	rs118203940
ARSB	Lysosomal degradation	chr5:78985011-78985014 (GRCh38.p12)	delC	ARSB : Frameshift	Mucopolysaccharidosis type VI (Maroteaux-Lamy syndrome)	1301949	rs431905493
ARSB	Lysosomal degradation	chr5:78839427 (GRCh38.p12)	C>G	ARSB : Splice Acceptor Variant	Mucopolysaccharidosis type VI (Maroteaux-Lamy syndrome)	26909334	rs431905495
ARSB	Lysosomal degradation	chr5:78839434 (GRCh38.p12)	A>C	ARSB : Intron Variant	Mucopolysaccharidosis type VI (Maroteaux-Lamy syndrome)	17643332	rs431905496
ARSB	Lysosomal degradation	chr5:78984965 (GRCh38.p12)	C>G / C>T	ARSB : Missense Variant	Mucopolysaccharidosis type VI (Maroteaux-Lamy syndrome)	8651289	rs118203942
ARSB	Lysosomal degradation	chr5:78839391 (GRCh38.p12)	T>C / T>G	ARSB : Missense Variant	Mucopolysaccharidosis type VI (Maroteaux-Lamy syndrome)	8651289	rs118203944
ARSB	Lysosomal degradation	chr5:78964477 (GRCh38.p12)	T>C	ARSB : Missense Variant	Mucopolysaccharidosis type VI (Maroteaux-Lamy syndrome)	8651289	rs118203943
ATG10	Membrane elongation	chr5:82011593 (GRCh38.p12)	C>T	ATG10 : Intron Variant	Breast cancer	23850577	rs10514231
ATG10	Membrane elongation	chr5:82253421 (GRCh38.p12)	C>A / C>G	ATG10 : Missense Variant	Breast cancer	23850577	rs1864182
ATG10	Membrane elongation	chr5:82242227 (GRCh38.p12)	T>A	ATG10 : Intron Variant	Breast cancer	25751625	rs7707921
ATG10	Membrane elongation	chr5:82253397 (GRCh38.p12)	C>T	ATG10 : Missense Variant	Paget's disease of the bone	26030385	rs1864183
ATG10	Membrane elongation	chr5:81980204 (GRCh38.p12)	C>A / C>T	ATG10 : Intron Variant	VKH Syndrome	26747760	rs4703863
ATG10	Membrane elongation	chr5:82011593 (GRCh38.p12)	C>T	ATG10 : Intron Variant	Non-small cell lung cancer	27225307	rs10514231
ATG10	Membrane elongation	chr5:82253421 (GRCh38.p12)	C>A / C>G	ATG10 : Missense Variant	Non-small cell lung cancer	27225307	rs1864182
ATG10	Membrane elongation	chr5:82253397 (GRCh38.p12)	C>T	ATG10 : Missense Variant	Non-small cell lung cancer	27225307	rs1864183
ATG10	Membrane elongation	chr5:82253421 (GRCh38.p12)	C>A / C>G / C>T	ATG10 : Missense Variant	Melanoma	27748080	rs1864182
ATG10	Membrane elongation	chr5:81970563 (GRCh38.p12)	A>T	ATG10 : 2KB Upstream Variant	Brain metastasis (from NSCLC)	28441070	rs10036653
ATG10	Membrane elongation	chr5:82253397 (GRCh38.p12)	C>T	ATG10 : Missense Variant	Head and neck squamous cell carcinoma	28761177	rs1864183
ATG10	Membrane elongation	chr5:82253421 (GRCh38.p12)	C>A / C>G / C>T	ATG10 : Missense Variant	Pneumoconiosis	28844669	rs1864182
ATG10	Membrane elongation	chr5:81970563 (GRCh38.p12)	A>T	ATG10 : 2KB Upstream Variant	Lung cancer	29259263	rs10036653
ATG10	Membrane elongation	chr5:82253421 (GRCh38.p12)	C>A / C>G / C>T	ATG10 : Missense Variant	Lung cancer	29259263	rs1864182
ATG10	Membrane elongation	chr5:82011593 (GRCh38.p12)	C>T	ATG10 : Intron Variant	Hepatocellular carcinoma	31340167	rs10514231
ATG10	Membrane elongation	chr5:82253397 (GRCh38.p12)	C>T	ATG10 : Missense Variant	Hepatocellular carcinoma	31340167	rs1864183
ATG10	Membrane elongation	chr5:82011593 (GRCh38.p12)	C>T	ATG10 : Intron Variant	Nasopharyngeal carcinoma	31692259	rs10514231
ATG10	Membrane elongation	chr5:82253397 (GRCh38.p12)	C>T	ATG10 : Missense Variant	Nasopharyngeal carcinoma	31692259	rs1864183
ATG10	Membrane elongation	chr5:81970378 (GRCh38.p12)	C>G	ATG10 : 2KB Upstream Variant	Nasopharyngeal carcinoma	31692259	rs4703533
ATG12	Membrane elongation	chr5:115837981 (GRCh38.p12)	C>A	ATG12 : Intron Variant	Brain metastasis (from NSCLC)	28441070	rs26532
ATG12	Membrane elongation	chr5:115842698 (GRCh38.p12)	C>T	ATG12 : 2KB Upstream Variant	Pneumoconiosis	28844669	rs26538
ATG12	Membrane elongation	chr5:115842698 (GRCh38.p12)	C>T	ATG12 : 2KB Upstream Variant	Lung cancer	29259263	rs26538
ATG12	Membrane elongation	chr5:115841317 (GRCh38.p12)	T>C / T>G	ATG12 : Intron Variant	Head and neck squamous cell carcinoma	29637616	rs26537
ATG12	Membrane elongation	chr5:115841317 (GRCh38.p12)	T>C / T>G	ATG12 : Intron Variant	Hepatocellular carcinoma	31340167	rs26537
ATG13	Autophagy initiation	chr11:46328319 (GRCh38.p12)	T>C	Unknown	Selective immunoglobulin A deficiency	27723758	rs4565870
ATG13	Autophagy initiation	chr11:46675649 (GRCh38.p12)	G>C / G>T	ATG13 : Non Coding Transcript Variant	Breast cancer	30514381	rs10838611
ATG14L	Membrane nucleation	chr14:55413329 (GRCh38.p12)	G>A	ATG14 : 2KB Upstream Variant	Testicular Germ Cell Tumor	28604728	rs1009647
ATG16L1	Membrane elongation	chr2:233274722 (GRCh38.p12)	A>G	ATG16L1 : Missense Variant	Crohn's Disease	18985712	rs2241880
ATG16L1	Membrane elongation	chr2:233274822 (GRCh38.p12)	G>A	ATG16L1 : Intron Variant	Palmoplantar pustulosis	21513755	rs2241879
ATG16L1	Membrane elongation	chr2:233274722 (GRCh38.p12)	A>G	ATG16L1 : Missense Variant	Palmoplantar pustulosis	21513755	rs2241880
ATG16L1	Membrane elongation	chr2:233281403 (GRCh38.p12)	T>A / T>C / T>G	ATG16L1 : Intron Variant	Palmoplantar pustulosis	21513755	rs7587633
ATG16L1	Membrane elongation	chr2:233250193 (GRCh38.p12)	C>A / C>G / C>T	ATG16L1 : 2KB Upstream Variant	Psoriasis vulgaris	21879234	rs10210302
ATG16L1	Membrane elongation	chr2:233269807 (GRCh38.p12)	C>A / C>T	ATG16L1 : Intron Variant	Psoriasis vulgaris	21879234	rs12994971
ATG16L1	Membrane elongation	chr2:233286311 (GRCh38.p12)	T>G	ATG16L1 : Intron Variant	Psoriasis vulgaris	21879234	rs13005285
ATG16L1	Membrane elongation	chr2:233274822 (GRCh38.p12)	G>A	ATG16L1 : Intron Variant	Psoriasis vulgaris	21879234	rs2241879
ATG16L1	Membrane elongation	chr2:233274722 (GRCh38.p12)	A>G	ATG16L1 : Missense Variant	Psoriasis vulgaris	21879234	rs2241880
ATG16L1	Membrane elongation	chr2:233274722 (GRCh38.p12)	A>G	ATG16L1 : Missense Variant	Cell-derived thyroid carcinoma	22302078	rs2241880
ATG16L1	Membrane elongation	chr2:233274722 (GRCh38.p12)	A>G	ATG16L1 : Missense Variant	Colorectal cancer	25645662	rs2241880
ATG16L1	Membrane elongation	chr2:233274722 (GRCh38.p12)	A>G	ATG16L1 : Missense Variant	Paget's disease of the bone	26030385	rs2241880
ATG16L1	Membrane elongation	chr2:233210531 (GRCh38.p12)	G>A	Unknown	Prostate cancer	26365175	rs78835907
ATG16L1	Membrane elongation	chr2:233274722 (GRCh38.p12)	A>G	ATG16L1 : Missense Variant	Gastric cancer	26547861	rs2241880
ATG16L1	Membrane elongation	chr2:233274722 (GRCh38.p12)	A>G	ATG16L1 : Missense Variant	Melanoma	27748080	rs2241880
ATG16L1	Membrane elongation	chr2:233274722 (GRCh38.p12)	A>G	ATG16L1 : Missense Variant	Brain metastasis (from NSCLC)	28441070	rs2241880
ATG16L1	Membrane elongation	chr2:233274722 (GRCh38.p12)	A>G	ATG16L1 : Missense Variant	Head and neck squamous cell carcinoma	28761177	rs2241880
ATG16L1	Membrane elongation	chr2:233274722 (GRCh38.p12)	A>G	ATG16L1 : Missense Variant	Lung cancer	29259263	rs2241880
ATG16L1	Membrane elongation	chr2:233285017 (GRCh38.p12)	A>T	ATG16L1 : Intron Variant	Head and neck squamous cell carcinoma	29637616	rs4663402
ATG16L1	Membrane elongation	chr2:233285017 (GRCh38.p12)	A>T	ATG16L1 : Intron Variant	Hepatocellular carcinoma	31340167	rs4663402
ATG16L1	Membrane elongation	chr2:233274722 (GRCh38.p12)	A>G	ATG16L1 : Missense Variant	Helicobacter pylori infection	28111844; 25664588; 22333951	rs2241880
ATG2A	Membrane nucleation	chr11:64895755 (GRCh38.p12)	C>T	ATG2A : Intron Variant	Granuloma formation in Crohn's disease	22261526	rs17146441
ATG2A	Membrane nucleation	chr11:64911072 (GRCh38.p12)	G>A	ATG2A : Missense Variant	Hyperuricemia	28410202	rs188780113
ATG2B	Membrane nucleation	chr14:96311131 (GRCh38.p12)	G>C	ATG2B : Missense Variant	Non-muscle invasive bladder cancer	25356988	rs3759601
ATG2B	Membrane nucleation	chr14:96311131 (GRCh38.p12)	G>C	ATG2B : Missense Variant	Head and neck squamous cell carcinoma	28761177	rs3759601
ATG4A	Membrane elongation	chrX:108153728 (GRCh38.p12)	A>G	ATG4A : Non Coding Transcript Variant	Cervical Cancer	29435029	rs5973822
ATG4A	Membrane elongation	chrX:108090623 (GRCh38.p12)	A>G	ATG4A : 2KB Upstream Variant	Cervical Cancer	29435029	rs4036579
ATG4A	Membrane elongation	chrX:108090354 (GRCh38.p12)	G>C / G>T	ATG4A : 2KB Upstream Variant	Cervical Cancer	29435029	rs807181
ATG4A	Membrane elongation	chrX:108092031 (GRCh38.p12)	A>C	ATG4A : Intron Variant	Cervical Cancer	29435029	rs807182
ATG4A	Membrane elongation	chrX:108094263 (GRCh38.p12)	G>A	ATG4A : Intron Variant	Cervical Cancer	29435029	rs807183
ATG4A	Membrane elongation	chrX:108097488 (GRCh38.p12)	A>T	ATG4A : Intron Variant	Lung cancer	26061994	rs807185
ATG4A	Membrane elongation	chrX:108153728 (GRCh38.p12)	A>G	ATG4A : Non Coding Transcript Variant	Granuloma formation in Crohn's disease	22261526	rs5973822
ATG4A	Membrane elongation	chrX:108111552 (GRCh38.p12)	G>A / G>C	ATG4A : Intron Variant	Clear cell renal cell carcinoma	30275199	rs7880351
ATG4B	Membrane elongation	chr2:241671358 (GRCh38.p12)	T>A / T>G	ATG4B : Missense Variant	Obesity	31160809	rs7601000
ATG4B	Membrane elongation	chr2:241654811 (GRCh38.p12)	C>T	ATG4B : Intron Variant	Atherosclerosis	30510157	rs139302128
ATG4C	Membrane elongation	chr1:62862187 (GRCh38.p12)	G>A	ATG4C : Intron Variant	Clear cell renal cell carcinoma	30275199	rs6670694
ATG4C	Membrane elongation	chr1:62811233 (GRCh38.p12)	G>A / G>T	ATG4C : Intron Variant	Clear cell renal cell carcinoma	30275199	rs6683832
ATG4C	Membrane elongation	chr1:62787158 (GRCh38.p12)	G>A	ATG4C : Intron Variant	Kashin-Beck disease	27742532	rs11208030
ATG4C	Membrane elongation	chr1:62801139 (GRCh38.p12)	G>A	ATG4C : Intron Variant	Kashin-Beck disease	27742532	rs4409690
ATG4C	Membrane elongation	chr1:62847648 (GRCh38.p12)	T>C	ATG4C : Intron Variant	Kashin-Beck disease	27742532	rs12097658
ATG4C	Membrane elongation	chr1:62787095 (GRCh38.p12)	C>T	ATG4C : Intron Variant	Kashin-Beck disease	27742532	rs6587988
ATG4D	Membrane elongation	chr19:10538257 (GRCh38.p12)	C>T	Unknown	Granuloma formation in Crohn's disease	22261526	rs7248036
ATG4D	Membrane elongation	chr19:10548983 (GRCh38.p12)	C>T	ATG4D : Synonymous Variant	Granuloma formation in Crohn's disease	22261526	rs2304165
ATG5	Membrane elongation	chr6:106132754 (GRCh38.p12)	G>A	ATG5 : Intron Variant	Systemic lupus erythematosus	21622776	rs6937876
ATG5	Membrane elongation	chr6:106301433 (GRCh38.p12)	G>A	ATG5 : Intron Variant	Asthma	22040902	rs12212740
ATG5	Membrane elongation	chr6:106208887 (GRCh38.p12)	C>A	ATG5 : Intron Variant	Asthma	22536318	rs11751513
ATG5	Membrane elongation	chr6:106194812 (GRCh38.p12)	C>A	ATG5 : Intron Variant	Asthma	22536318	rs12201458
ATG5	Membrane elongation	chr6:106219931 (GRCh38.p12)	T>G	ATG5 : Intron Variant	Asthma	22536318	rs2299863
ATG5	Membrane elongation	chr6:106326155 (GRCh38.p12)	T>C	ATG5 : 2KB Upstream Variant	Asthma	22536318	rs510432
ATG5	Membrane elongation	chr6:106326155 (GRCh38.p12)	T>C	ATG5 : 2KB Upstream Varian	Parkinson's disease	23384565	rs510432
ATG5	Membrane elongation	chr6:106237320 (GRCh38.p12)	G>C	ATG5 : Intron Variant	Systemic lupus erythematosus	23740937	rs3827644
ATG5	Membrane elongation	chr6:106237320 (GRCh38.p12)	G>C	ATG5 : Intron Variant	Systemic sclerosis	23740937	rs3827644
ATG5	Membrane elongation	chr6:106207742 (GRCh38.p12)	T>C	ATG5 : Intron Variant	Systemic sclerosis	24387989	rs9373839
ATG5	Membrane elongation	chr6:106214866 (GRCh38.p12)	C>G	ATG5 : Intron Variant	Non-medullary thyroid cancer	24739953	rs2245214
ATG5	Membrane elongation	chr6:106120159 (GRCh38.p12)	C>T	ATG5 : Intron Variant	Neuromyelitis optica	24953774	rs548234
ATG5	Membrane elongation	chr6:106132754 (GRCh38.p12)	G>A	ATG5 : Intron Variant	Neuromyelitis optica	24953774	rs6937876
ATG5	Membrane elongation	chr6:106214866 (GRCh38.p12)	C>G	ATG5 : Intron Variant	Paget's disease of the bone	26030385	rs2245214
ATG5	Membrane elongation	chr6:106316991 (GRCh38.p12)	G>A	ATG5 : Intron Variant	Behçet's Disease	26747760	rs573775
ATG5	Membrane elongation	chr6:106279773 (GRCh38.p12)	T>A	ATG5 : Missense Variant	Spinocerebellar Ataxia	26812546	rs1131692265
ATG5	Membrane elongation	chr6:106326155 (GRCh38.p12)	T>C	ATG5 : 2KB Upstream Varian	Crohn's Disease	27096233	rs510432
ATG5	Membrane elongation	chr6:106207742 (GRCh38.p12)	T>C	ATG5 : Intron Variant	Crohn's Disease	27096233	rs9373839
ATG5	Membrane elongation	chr6:106219660 (GRCh38.p12)	T>G	ATG5 : Intron Variant	Multiple myeloma	27363682	rs9372120
ATG5	Membrane elongation	chr6:106214866 (GRCh38.p12)	C>G	ATG5 : Intron Variant	Melanoma	27748080	rs2245214
ATG5	Membrane elongation	chr6:106326155 (GRCh38.p12)	T>C	ATG5 : 2KB Upstream Varian	Melanoma	27748080	rs510432
ATG5	Membrane elongation	chr6:106326589 (GRCh38.p12)	G>A	ATG5 : 2KB Upstream Variant	Sepsis	28839236	rs506027
ATG5	Membrane elongation	chr6:106326155 (GRCh38.p12)	T>C	ATG5 : 2KB Upstream Varian	Sepsis	28839236	rs510432
ATG5	Membrane elongation	chr6:106326155 (GRCh38.p12)	T>C	ATG5 : 2KB Upstream Varian	Pneumoconiosis	28844669	rs510432
ATG5	Membrane elongation	chr6:106183905 (GRCh38.p12)	C>T	Unknown	Esophageal squamous cell carcinoma	29207660	rs1322178
ATG5	Membrane elongation	chr6:106238552 (GRCh38.p12)	A>G	ATG5 : Intron Variant	Esophageal squamous cell carcinoma	29207660	rs3804329
ATG5	Membrane elongation	chr6:106312722 (GRCh38.p12)	A>C / A>G	ATG5 : Intron Variant	Esophageal squamous cell carcinoma	29207660	rs671116
ATG5	Membrane elongation	chr6:106326155 (GRCh38.p12)	T>C	ATG5 : 2KB Upstream Varian	Lung cancer	29259263	rs510432
ATG5	Membrane elongation	chr6:106328206 (GRCh38.p12)	A>G	Unknown	Lung cancer	29259263	rs688810
ATG5	Membrane elongation	chr6:106140931 (GRCh38.p12)	A>C	Unknown	Cerebral palsy	29326554	rs6568431
ATG5	Membrane elongation	chr6:106327811 (GRCh38.p12)	A>C / A>G	ATG5 : 2KB Upstream Variant	Breast cancer	29382381	rs473543
ATG5	Membrane elongation	chr6:106214866 (GRCh38.p12)	C>G	ATG5 : Intron Variant	Non-small cell lung cancer	30242869	rs2245214
ATG5	Membrane elongation	chr6:106292583 (GRCh38.p12)	A>G	ATG5 : Intron Variant	Clear cell renal cell carcinoma	30275199	rs490010
ATG5	Membrane elongation	chr6:106214866 (GRCh38.p12)	C>G	ATG5 : Intron Variant	Chronic Q fever	30616015	rs2245214
ATG5	Membrane elongation	chr6:106327811 (GRCh38.p12)	A>C / A>G	ATG5 : 2KB Upstream Variant	Aplastic anemia	30767262	rs473543
ATG5	Membrane elongation	chr6:106326155 (GRCh38.p12)	T>C	ATG5 : 2KB Upstream Variant	Aplastic anemia	30767262	rs510432
ATG5	Membrane elongation	chr6:106316991 (GRCh38.p12)	G>A / G>C	ATG5 : Intron Variant	Aplastic anemia	30767262	rs573775
ATG5	Membrane elongation	chr6:106318254 (GRCh38.p12)	G>A / G>C	ATG5 : Intron Variant	Aplastic anemia	30767262	rs803360
ATG5	Membrane elongation	chr6:106326155 (GRCh38.p12)	T>C	ATG5 : 2KB Upstream Varian	HBV infection	30907204	rs510432
ATG5	Membrane elongation	chr6:106786391 (GRCh38.p12)	A>G	LINC02532 : Intron Variant	Hepatocellular carcinoma	31340167	rs17067724
ATG5	Membrane elongation	chr6:106120159 (GRCh38.p12)	C>A / C>G / C>T	Unknown	HBV infection	31729038	rs548234
ATG5	Membrane elongation	chr6:106140931 (GRCh38.p12)	A>C	Unknown	HBV infection	31729038	rs6568431
ATG5	Membrane elongation	chr6:106316991 (GRCh38.p12)	Autophagosome elongation	ATG5 : Intron Variant	Systemic lupus erythematosus	18204446; 23049788; 24205307; 29759048; 32783391	rs573775
ATG5	Membrane elongation	chr6:106120159 (GRCh38.p12)	C>T	ATG5 : Intron Variant	Systemic lupus erythematosus	21622776; 26420661	rs548234
ATG7	Membrane elongation	chr3:11302077 (GRCh38.p12)	C>A	ATG7 : Intron Variant	Systemic lupus erythematosus	21622776	rs11706903
ATG7	Membrane elongation	chr8:11486464 (GRCh38.p12)	C>A / C>G / C>T	Unknown	Systemic lupus erythematosus	26420661	rs2736340
ATG7	Membrane elongation	chr3:11554828 (GRCh38.p12)	T>C	ATG7 : Synonymous Variant	Breast cancer	28669927	rs8154
ATG7	Membrane elongation	chr3:11283590 (GRCh38.p12)	G>A	ATG7 : Intron Variant	Ischemic stroke	29123153	rs2594966
ATG7	Membrane elongation	chr3:11354347 (GRCh38.p12)	C>G / C>T	ATG7 : Intron Variant	Ischemic stroke	29123153	rs2594973
ATG7	Membrane elongation	chr3:11401749 (GRCh38.p12)	T>C / T>G	ATG7 : Intron Variant	Ischemic stroke	29123153	rs4684776
ATG7	Membrane elongation	chr3:11554828 (GRCh38.p12)	T>C	ATG7 : Synonymous Variant	Lung cancer	29259263	rs8154
ATG7	Membrane elongation	chr3:11358775 (GRCh38.p12)	C>A / C>G / C>T	ATG7 : Intron Variant	Clear cell renal cell carcinoma	30827239	rs2606736
ATG7	Membrane elongation	chr3:11549277 (GRCh38.p12)	G>A	ATG7 : Intron Variant	Clear cell renal cell carcinoma	30827239	rs6442260
ATG7	Membrane elongation	chr3:11295492 (GRCh38.p12)	C>T	ATG7 : Intron Variant	Cerebral palsy	31749688	rs1470612
ATG7	Membrane elongation	chr3:11355943 (GRCh38.p12)	A>G / A>T	ATG7 : Intron Variant	Cerebral palsy	31749688	rs2594972
ATG7	Membrane elongation	chr3:11358545 (GRCh38.p12)	T>C	ATG7 : Missense Variant	Hungtinton's disease	20697744; 23894380	rs36117895
ATG9B	Membrane nucleation	chr7:151017725 (GRCh38.p12)	G>A	ATG9B : Intron Variant	Coronary Artery Disease	31384404	rs2373929
ATG9B	Membrane nucleation	chr7:151012483 (GRCh38.p12)	G>T	ATG9B : Non Coding Transcript Variant	Coronary Artery Disease	31384404	rs7830
ATGL/PNPLA2	Selective autophagy receptor	chr11:822494 (GRCh38.p12)	C>T	PNPLA2 : Missense Variant	Neutral lipid storage disease with myopathy	22990388	rs121918259
ATL3	Selective autophagy receptor	chr11:63646550 (GRCh38.p12)	T>C	ATL3 : Missense Variant	Hereditary Sensory Autonomic Neuropathy	24736309	rs587777108
BECN1	Membrane nucleation	chr17:42825095 (GRCh38.p12)	C>A / C>G	BECN1 : 2KB Upstream Variant	Machado-Joseph Disease	28699106	rs60221525
BECN1	Membrane nucleation	chr17:42811886 (GRCh38.p12)	G>A	BECN1 : Intron Variant	Diabetes	28060188	rs10512488
BIRC6	Autophagosome-lysosome fusion	chr2:32545090 (GRCh38.p12)	A>T	BIRC6 : Intron Variant	Glaucoma	25118708	rs2754511
BNIP3	Selective autophagy receptor	chr10:132020811 (GRCh38.p12)	C>T	Unknown	Major Depressive Disorder	30034349	rs9419139
BNIP3L	Selective autophagy receptor	chr8:26411675 (GRCh38.p12)	C>T	BNIP3L : 3 Prime UTR Variant	Schizophrenia	26198764	rs1042992
BNIP3L	Selective autophagy receptor	chr8:26415252 (GRCh38.p12)	G>A	Unknown	Schizophrenia	30285260	rs73219805
BNIP3L	Selective autophagy receptor	chr8:26421657 (GRCh38.p12)	C>A / C>G / C>T	Unknown	Schizophrenia	31374203	rs73219806
BNIP3L	Selective autophagy receptor	chr8:26454581 (GRCh38.p12)	G>A	Unknown	Cognitive decline	26252872	rs77609452
C9orf72	Autophagosome-lysosome fusion	chr9:27573541-27573546 (GRCh38.p12)	insGGCCCTGG(C)4	C9orf72 : Intron Variant	Familial frontotemporal dementia with amyotrophic lateral sclerosis	21072532	rs71492753
C9orf72	Autophagosome-lysosome fusion	chr9:27543384 (GRCh38.p12)	C>G / C>T	Non Coding Transcript Variant	Amyotrophic Lateral Sclerosis	24256812	rs3849943
C9orf72	Autophagosome-lysosome fusion	chr9:27561051 (GRCh38.p12)	T>C	C9orf72 : Intron Variant	Amyotrophic Lateral Sclerosis	20801718	rs774359
C9orf72	Autophagosome-lysosome fusion	chr9:27543283 (GRCh38.p12)	T>A / T>C	Non Coding Transcript Variant	Amyotrophic Lateral Sclerosis	32035847	rs3849942
CHMP2B	Autophagosome-lysosome fusion	chr3:87253472 (GRCh38.p12)	C>T	CHMP2B : Stop Gained	Neuroblastoma	17956895	rs63750355
CHMP2B	Autophagosome-lysosome fusion	chr3:87253740 (GRCh38.p12)	G>A	CHMP2B : Missense Variant	Frontotemporal dementia	20592581	rs78268395
CHMP2B	Autophagosome-lysosome fusion	chr3:87245898 (GRCh38.p12)	C>A / C>T	CHMP2B : Missense Variant	Amyotrophic lateral sclerosis	20352044	rs281864934
CHMP2B	Autophagosome-lysosome fusion	chr3:87253421 (GRCh38.p12)	G>T	CHMP2B : Missense Variant	Frontotemporal dementia	16041373	rs63750653
CHMP4B	Autophagosome-lysosome fusion	chr20:33851064 (GRCh38.p12)	G>A	CHMP4B : Missense Variant	Cataracts	17701905	rs118203966
CHMP4B	Autophagosome-lysosome fusion	chr20:33848172 (GRCh38.p12)	C>A / C>G / C>T	CHMP4B : Intron Variant	Diabetes	30595370	rs7274168
CHMP4B	Autophagosome-lysosome fusion	chr20:33830562 (GRCh38.p12)	C>G / C>T	CHMP4B : Intron Variant	Dysphagia	26116289	rs2747539
CLN3	Lysosomal degradation	chr16:28482500 (GRCh38.p12)	C>A / C>T	CLN3 : Stop Gained	Neuronal Ceroid Lipofuscinosis Type 3	9450775	rs121434286
CLN3	Lysosomal degradation	chr16:28486427 (GRCh38.p12)	G>T	CLN3 : Stop Gained	Neuronal Ceroid Lipofuscinosis Type 3	19489875	rs267606737
CLN3	Lysosomal degradation	chr16:28487492-28487493 (GRCh38.p12)	delC	CLN3 : Frameshift	Neuronal Ceroid Lipofuscinosis Type 3	9311735	rs386833720
CLN3	Lysosomal degradation	chr16:28486617 (GRCh38.p12)	C>T	CLN3 : Missense Variant	Neuronal Ceroid Lipofuscinosis Type 3	24827497	rs786201028
CLN3	Lysosomal degradation	chr16:28482500 (GRCh38.p12)	C>A / C>T	CLN3 : Stop Gained	Neuronal Ceroid Lipofuscinosis Type 3	20301601	rs121434286
CLN6	Lysosomal degradation	chr15:68214373 (GRCh38.p12)	C>A / C>G / C>T	CLN6 : Stop Gained	Neuronal Ceroid Lipofuscinosis Type 6	11791207	rs104894483
CLN6	Lysosomal degradation	chr15:68209639 (GRCh38.p12)	G>A / G>C	CLN6 : Stop Gained	Neuronal Ceroid Lipofuscinosis Type 6	15996215	rs104894486
CLN6	Lysosomal degradation	chr15:68211289-68211294 (GRCh38.p12)	delATA	CLN6 : Inframe Deletion	Neuronal Ceroid Lipofuscinosis Type 6	11791207	rs121908079
CLN6	Lysosomal degradation	chr15:68211698-68211705 (GRCh38.p12)	delATG	CLN6 : Inframe Deletion	Neuronal Ceroid Lipofuscinosis Type 6	12673792	rs121908080
CLN6	Lysosomal degradation	chr15:68211845-68211850 (GRCh38.p12)	dupG	CLN6 : Frameshift	Neuronal Ceroid Lipofuscinosis Type 6	20301601	rs397515352
CLN6	Lysosomal degradation	chr15:68211765-68211768 (GRCh38.p12)	delAG	CLN6 : Frameshift	Neuronal Ceroid Lipofuscinosis Type 6	11727201	rs774543080
CLN6	Lysosomal degradation	chr15:68229578-68229579 (GRCh38.p12)	delC	CLN6 : Frameshift	Neuronal Ceroid Lipofuscinosis Type 6	11727201	rs786205065
CLN6	Lysosomal degradation	chr15:68211258 (GRCh38.p12)	C>A	CLN6 : Intron Variant	Neuronal Ceroid Lipofuscinosis Type 6	15996215	rs786205066
CLN6	Lysosomal degradation	chr15:68214316-68214319 (GRCh38.p12)	dupCGTT	CLN6 : Frameshift	Neuronal Ceroid Lipofuscinosis Type 6	12673792	rs786205067
CLN6	Lysosomal degradation	chr15:68211793 (GRCh38.p12)	C>T	CLN6 : Missense Variant	Neuronal Ceroid Lipofuscinosis Type 6	11727201	rs104894484
CLN6	Lysosomal degradation	chr15:68214387 (GRCh38.p12)	A>G	CLN6 : Missense Variant	Adult Neuronal Ceroid Lipofuscinosis	21549341	rs154774633
CLN6	Lysosomal degradation	chr15:68211853 (GRCh38.p12)	C>T	CLN6 : Missense Variant	Adult Neuronal Ceroid Lipofuscinosis	21549341	rs154774634
CLN6	Lysosomal degradation	chr15:68218595 (GRCh38.p12)	G>A	CLN6 : Missense Variant	Adult Neuronal Ceroid Lipofuscinosis	21549341	rs154774635
CLN6	Lysosomal degradation	chr15:68229568 (GRCh38.p12)	C>G	CLN6 : Missense Variant	Adult Neuronal Ceroid Lipofuscinosis	21549341	rs154774636
CLN8	Lysosomal degradation	chr8:1780316 (GRCh38.p12)	C>T	CLN8 : Missense Variant	Neuronal Ceroid Lipofuscinosis Type 8	15024724	rs104894060
CLN8	Lysosomal degradation	chr8:1771124 (GRCh38.p12)	C>G / C>T	CLN8 : Missense Variant	Northern epilepsy syndrome	10508524	rs104894064
CLN8	Lysosomal degradation	chr8:1771142 (GRCh38.p12)	G>A / G>C / G>T	CLN8 : Missense Variant	Neuronal Ceroid Lipofuscinosis Type 8	16570191	rs137852883
CLN8	Lysosomal degradation	chr8:1780495 (GRCh38.p12)	G>C	CLN8 : Missense Variant	Neuronal Ceroid Lipofuscinosis Type 8	15074367	rs28940569
CTNS	Lysosomal degradation	chr17:3660224 (GRCh38.p12)	G>A / G>C	CTNS : Intron Variant	Cystinosis	25326109	rs375952052
CTSA	Lysosomal degradation	chr20:45898068 (GRCh38.p12)	T>G	CTSA : Missense Variant	Galactosialidosis	8968752	rs137854540
CTSA	Lysosomal degradation	chr20:45894040 (GRCh38.p12)	T>A	CTSA : Missense Variant	Galactosialidosis	8968752	rs137854544
CTSA	Lysosomal degradation	chr20:45894002 (GRCh38.p12)	T>C	CTSA : Missense Variant	Galactosialidosis	8968752	rs137854546
CTSA	Lysosomal degradation	chr20:45898065 (GRCh38.p12)	G>A	CTSA : Missense Variant	Galactosialidosis	8968752	rs137854547
CTSA	Lysosomal degradation	chr20:45897769 (GRCh38.p12)	T>A / T>C	CTSA : Missense Variant	Galactosialidosis	8968752	rs137854548
CTSA	Lysosomal degradation	chr20:45898107 (GRCh38.p12)	A>G	CTSA : Missense Variant	Galactosialidosis	10944848	rs137854549
CTSA	Lysosomal degradation	chr20:45893314 (GRCh38.p12)	A>G	CTSA : Intron Variant	Galactosialidosis	26259553	rs786200859
CTSA	Lysosomal degradation	chr20:45894704-45894706 (GRCh38.p12)	delAT	CTSA : Frameshift	Galactosialidosis	24769197	rs875989777
CTSA	Lysosomal degradation	chr20:45894040 (GRCh38.p12)	T>A	CTSA : Missense Variant	Galactosialidosis	24769197	rs137854544
CTSA	Lysosomal degradation	chr20:45897736 (GRCh38.p12)	A>G	CTSA : Missense Variant	Galactosialidosis	8514852	rs137854543
CTSD	Lysosomal degradation	chr11:1754969 (GRCh38.p12)	dupT	CTSD : Stop Gained	Neuronal Ceroid Lipofuscinosis Type 10	16670177	rs786205105
CTSD	Lysosomal degradation	chr11:1758994 (GRCh38.p12)	C>A	CTSD : Missense Variant	Neuronal Ceroid Lipofuscinosis Type 10	25298308	rs797045137
CTSD	Lysosomal degradation	chr11:1753546 (GRCh38.p12)	C>T	CTSD : Missense Variant	Neuronal Ceroid Lipofuscinosis Type 10	25298308	rs797045138
CTSD	Lysosomal degradation	chr11:1757343 (GRCh38.p12)	A>T	CTSD : Missense Variant	Neuronal Ceroid Lipofuscinosis Type 10	16685649	rs121912789
CTSD	Lysosomal degradation	chr11:1753593 (GRCh38.p12)	C>G	CTSD : Missense Variant	Neuronal Ceroid Lipofuscinosis Type 10	16685649	rs121912790
CTSF	Lysosomal degradation	chr11:66565841 (GRCh38.p12)	delG	CTSF : Frameshift	Neuronal Ceroid Lipofuscinosis Type 13	23297359	rs753084727
CTSF	Lysosomal degradation	chr11:66568273 (GRCh38.p12)	C>G	CTSF : Splice Donor Variant	Neuronal Ceroid Lipofuscinosis Type 13	25274848	rs797045136
CTSF	Lysosomal degradation	chr11:66566320 (GRCh38.p12)	T>C	CTSF : Missense Variant	Neuronal Ceroid Lipofuscinosis Type 13	23297359	rs143889283
CTSF	Lysosomal degradation	chr11:66565833 (GRCh38.p12)	T>C	CTSF : Missense Variant	Neuronal Ceroid Lipofuscinosis Type 13	23297359	rs397514731
DNAJC5	Lysosomal degradation	chr20:63930871-63930877 (GRCh38.p12)	delCTC	DNAJC5 : Inframe Deletion	Ceroid Lipofuscinosis, Neuronal, Parry Type	21820099	rs587776892
DNAJC5	Lysosomal degradation	chr20:63930873 (GRCh38.p12)	T>A / T>G	DNAJC5 : Missense Variant	Ceroid Lipofuscinosis, Neuronal, Parry Type	21820099	rs387907043
EPG5	Autophagosome-lysosome fusion	chr18:45855683 (GRCh38.p12)	G>A	EPG5 : Stop Gained	Vici syndrome	25331754	rs863225064
EPG5	Autophagosome-lysosome fusion	chr18:45968690 (GRCh38.p12)	C>T	EPG5 : 2KB Upstream Variant	Alzheimer's disease	27586004	rs9963463
EPG5	Autophagosome-lysosome fusion	chr18:45951902 (GRCh38.p12)	A>G	EPG5 : Intron Variant	Depressive disorders	29486404	rs58682566
EPG5	Autophagosome-lysosome fusion	chr18:45922762 (GRCh38.p12)	T>C	EPG5 : Intron Variant	Alzheimer's Disease	27586004	rs11082498
EPG5	Autophagosome-lysosome fusion	chr18:45951239 (GRCh38.p12)	C>T	EPG5 : Splice Acceptor Variant	Vici syndrome	23222957	rs1470797555
EPG5	Autophagosome-lysosome fusion	chr18:45913824 (GRCh38.p12)	C>T	EPG5 : Stop Gained	Vici syndrome	23222957	rs1555673917
EPG5	Autophagosome-lysosome fusion	chr18:45870708 (GRCh38.p12)	C>T	EPG5 : Stop Gained	Vici syndrome	26917586	rs1568107449
EPG5	Autophagosome-lysosome fusion	chr18:45876292 (GRCh38.p12)	G>C	EPG5 : Stop Gained	Vici syndrome	26917586	rs1568112516
EPG5	Autophagosome-lysosome fusion	chr18:45876319 (GRCh38.p12)	C>T	EPG5 : Stop Gained	Vici syndrome	26917586	rs1568112543
EPG5	Autophagosome-lysosome fusion	chr18:45882313 (GRCh38.p12)	G>C	EPG5 : Missense Variant	Vici syndrome	29130391	rs1568118775
EPG5	Autophagosome-lysosome fusion	chr18:45899430 (GRCh38.p12)	G>A	EPG5 : Stop Gained	Vici syndrome	23222957	rs1568133724
EPG5	Autophagosome-lysosome fusion	chr18:45899462 (GRCh38.p12)	A>T	EPG5 : Stop Gained	Vici syndrome	23222957	rs1568133760
EPG5	Autophagosome-lysosome fusion	chr18:45954395 (GRCh38.p12)	T>C	EPG5 : Missense Variant	Cataract	31184778	rs201757275
EPG5	Autophagosome-lysosome fusion	chr18:45954395 (GRCh38.p12)	T>C	EPG5 : Missense Variant	Vici syndrome	25331754	rs201757275
EPG5	Autophagosome-lysosome fusion	chr18:45901054 (GRCh38.p12)	G>A	EPG5 : Stop Gained	Vici syndrome	23222957	rs587776939
EPG5	Autophagosome-lysosome fusion	chr18:45916110 (GRCh38.p12)	G>A / G>C	EPG5 : Stop Gained	Vici syndrome	23222957	rs587776940
EPG5	Autophagosome-lysosome fusion	chr18:45925881 (GRCh38.p12)	C>A	EPG5 : Stop Gained	Vici syndrome	23222957	rs587776941
EPG5	Autophagosome-lysosome fusion	chr18:45867742 (GRCh38.p12)	G>A	EPG5 : Stop Gained	Vici syndrome	26917586	rs587776942
EPG5	Autophagosome-lysosome fusion	chr18:45949543-45949550 (GRCh38.p12)	delGAAG	EPG5 : Stop Gained	Vici syndrome	26917586	rs762639913
EPG5	Autophagosome-lysosome fusion	chr18:45954507 (GRCh38.p12)	G>A / G>C	EPG5 : Stop Gained	Vici syndrome	29130391	rs767638289
EPG5	Autophagosome-lysosome fusion	chr18:45857962 (GRCh38.p12)	G>A	EPG5 : Stop Gained	Vici syndrome	26917586	rs780889226
EPG5	Autophagosome-lysosome fusion	chr18:45855683 (GRCh38.p12)	G>A	EPG5 : Stop Gained	Vici syndrome	26917586	rs863225064
EPG5	Autophagosome-lysosome fusion	chr18:45955266 (GRCh38.p12)	G>A	EPG5 : Stop Gained	Vici syndrome	26917586	rs866435487
EPG5	Autophagosome-lysosome fusion	chr18:45952403 (GRCh38.p12)	G>A	EPG5 : Stop Gained	Vici syndrome	26917586	rs961245497
FAM134B/RETREG1	Selective autophagy receptor	chr5:16565788 (GRCh38.p12)	G>A	RETREG1 : Stop Gained	Hereditary Sensory Autonomic Neuropathy	19838196	rs137852737
FAM134B/RETREG1	Selective autophagy receptor	chr5:16478032 (GRCh38.p12)	A>G	RETREG1 : Splice Donor Variant	Hereditary Sensory Autonomic Neuropathy	21089229	rs137852738
FAM134B/RETREG1	Selective autophagy receptor	chr5:16477736 (GRCh38.p12)	G>A / G>C	RETREG1 : Stop Gained	Hereditary Sensory Autonomic Neuropathy	21089229	rs137852739
FAM134B/RETREG1	Selective autophagy receptor	chr5:16478081-16478086 (GRCh38.p12)	delT	RETREG1 : Frameshift Variant	Hereditary Sensory Autonomic Neuropathy	24327336	rs886037748
FAM47E-STBD1	Selective autophagy receptor	chr4:76277833 (GRCh38.p12)	C>T	FAM47E-STBD1 : Intron Variant	Parkinson's disease	28867149; 21738488	rs6812193
FIP200 / RB1CC1	Autophagy initiation	chr8:52624756 (GRCh38.p12)	A>C / A>G / A>T	RB1CC1 : Synonymous Variant	Hypertension	28347919	rs1129660
FUCA1	Lysosomal degradation	chr1:23845837 (GRCh38.p12)	G>A	FUCA1 : Stop Gained	Fucosidosis	10094192	rs118204450
FUCA1	Lysosomal degradation	chr1:23848671 (GRCh38.p12)	C>A / C>G	FUCA1 : Stop Gained	Fucosidosis	8739734	rs80358195
FUCA1	Lysosomal degradation	chr1:23868043 (GRCh38.p12)	G>A	FUCA1 : Stop Gained	Fucosidosis	8401503	rs80358196
FUCA1	Lysosomal degradation	chr1:23848649 (GRCh38.p12)	C>T	FUCA1 : Stop Gained	Fucosidosis	8401503	rs80358197
FUCA1	Lysosomal degradation	chr1:23863148 (GRCh38.p12)	G>A / G>T	FUCA1 : Stop Gained	Fucosidosis	8401503	rs80358198
FYCO1	Autophagosome-lysosome fusion	chr3:45968289 (GRCh38.p12)	G>A	FYCO1 : Stop Gained	Cataract	21636066	rs387906963
FYCO1	Autophagosome-lysosome fusion	chr3:45967128 (GRCh38.p12)	G>A	FYCO1 : Stop Gained	Cataract	21636066	rs387906964
FYCO1	Autophagosome-lysosome fusion	chr3:45931195 (GRCh38.p12)	A>G	FYCO1 : Missense Variant	Cataract	21636066	rs387906965
GAA	Lysosomal degradation	chr17:80113361-80113362 (GRCh38.p12)	delC	GAA : Frameshift Variant	Glycogen storage disease type II (Pompe disease)	28394184	rs1057516581
GAA	Lysosomal degradation	chr17:80102793 (GRCh38.p12)	A>C	GAA : Intron Variant	Glycogen storage disease type II (Pompe disease)	30072576	rs12450199
GAA	Lysosomal degradation	chr17:80110837 (GRCh38.p12)	G>A	GAA : Stop Gained	Glycogen storage disease type II (Pompe disease)	29122469	rs140826989
GAA	Lysosomal degradation	chr17:80113350 (GRCh38.p12	C>A / C>T	GAA : Missense Variant	Glycogen storage disease type II (Pompe disease)	28648663	rs121907938
GAA	Lysosomal degradation	chr17:80107818 (GRCh38.p12)	G>A	GAA : Missense Variant	Glycogen storage disease type II (Pompe disease)	29181627	rs121907945
GAA	Lysosomal degradation	chr17:80107894 (GRCh38.p12)	T>A / T>C	GAA : Missense Variant	Glycogen storage disease type II (Pompe disease)	29122469	rs121907936
GAA	Lysosomal degradation	chr17:80113242 (GRCh38.p12)	G>A / G>C	GAA : Missense Variant	Glycogen storage disease type II (Pompe disease)	29778277	rs1800309
GAA	Lysosomal degradation	chr17:80112072 (GRCh38.p12)	G>A	GAA : Missense Variant	Glycogen storage disease type II (Pompe disease)	31076647	rs1800307
GAA	Lysosomal degradation	chr17:80110726 (GRCh38.p12)	G>C / G>T	GAA : Splice Acceptor Variant	Glycogen storage disease type II (Pompe disease)	29122469	rs147804176
GAA	Lysosomal degradation	chr17:80108512 (GRCh38.p12	T>C	GAA : Missense Variant	Glycogen storage disease type II (Pompe disease)	29122469	rs1555600061
GAA	Lysosomal degradation	chr17:80113309-80113310 (GRCh38.p12)	CA>GG	GAA : Missense Variant	Glycogen storage disease type II (Pompe disease)	28394184	rs1555601773
GAA	Lysosomal degradation	chr17:80117016 (GRCh38.p12)	G>A / G>C	GAA : Stop Gained	Glycogen storage disease type II (Pompe disease)	29122469	rs1800312
GAA	Lysosomal degradation	chr17:80107616 (GRCh38.p12)	C>T	GAA : Missense Variant	Glycogen storage disease type II (Pompe disease)	29122469	rs200856561
GAA	Lysosomal degradation	chr17:80112664 (GRCh38.p12)	C>A / C>T	GAA : Missense Variant	Glycogen storage disease type II (Pompe disease)	27708273	rs369531647
GAA	Lysosomal degradation	chr17:80112922 (GRCh38.p12)	C>A / C>T	GAA : Missense Variant	Glycogen storage disease type II (Pompe disease)	28394184	rs28940868
GAA	Lysosomal degradation	chr17:80104552 (GRCh38.p12)	C>A / C>T	GAA : Intron Variant	Glycogen storage disease type II (Pompe disease)	19588081	rs1055945806
GAA	Lysosomal degradation	chr17:80108609 (GRCh38.p12)	T>C	GAA : Splice Donor Variant	Glycogen storage disease type II (Pompe disease)	18458862	rs1057516215
GAA	Lysosomal degradation	chr17:80117005 (GRCh38.p12)	C>T	GAA : Stop Gained	Glycogen storage disease type II (Pompe disease)	18285536	rs1057516277
GAA	Lysosomal degradation	chr17:80108487 (GRCh38.p12)	A>G	GAA : Splice Acceptor Variant	Glycogen storage disease type II (Pompe disease)	17027861	rs1057516290
GAA	Lysosomal degradation	chr17:80116992 (GRCh38.p12)	G>A	GAA : Stop Gained	Glycogen storage disease type II (Pompe disease)	17027861	rs1057516328
GAA	Lysosomal degradation	chr17:80112081 (GRCh38.p12)	G>A / G>C	GAA : Missense Variant	Glycogen storage disease type II (Pompe disease)	14695532	rs991082382
GAA	Lysosomal degradation	chr17:80112680 (GRCh38.p12)	C>G / C>T	GAA : Missense Variant	Glycogen storage disease type II (Pompe disease)	25173338	rs914396317
GAA	Lysosomal degradation	chr17:80110953 (GRCh38.p12)	C>A / C>G / C>T	GAA : Missense Variant	Glycogen storage disease type II (Pompe disease)	25712382	rs892129065
GAA	Lysosomal degradation	chr17:80118210-80118213 (GRCh38.p12)	delCA	GAA : Frameshift Variant	Glycogen storage disease type II (Pompe disease)	19588081	rs886043343
GAA	Lysosomal degradation	chr17:80110950 (GRCh38.p12)	G>A	GAA : Missense Variant	Glycogen storage disease type II (Pompe disease)	17643989	rs121907937
GAA	Lysosomal degradation	chr17:80107837 (GRCh38.p12)	T>C / T>G	GAA : Missense Variant	Glycogen storage disease type II (Pompe disease)	19588081	rs121907940
GAA	Lysosomal degradation	chr17:80110974-80110975 (GRCh38.p12)	TC>GT	GAA : Missense Variant	Glycogen storage disease type II (Pompe disease)	8834250	rs121907941
GAA	Lysosomal degradation	chr17:80111023 (GRCh38.p12)	C>T	GAA : Missense Variant	Glycogen storage disease type II (Pompe disease)	11738358	rs121907942
GAA	Lysosomal degradation	chr17:80118271 (GRCh38.p12)	C>T	GAA : Stop Gained	Glycogen storage disease type II (Pompe disease)	11071489	rs121907943
GAA	Lysosomal degradation	chr17:80107574 (GRCh38.p12)	C>A / C>T	GAA : Missense Variant	Glycogen storage disease type II (Pompe disease)	17643989	rs121907944
GAA	Lysosomal degradation	chr17:80118752 (GRCh38.p12)	G>T	GAA : Missense Variant	Glycogen storage disease type II (Pompe disease)	11071489	rs1221948995
GAA	Lysosomal degradation	chr17:80119318 (GRCh38.p12)	T>A	GAA : Missense Variant	Glycogen storage disease type II (Pompe disease)	16782080	rs1245412108
GAA	Lysosomal degradation	chr17:80104591 (GRCh38.p12)	G>A / G>C	GAA : Missense Variant	Friedreich Ataxia	10913738	rs1245992455
GAA	Lysosomal degradation	chr17:80118690-80118694 (GRCh38.p12)	delAGGGA	GAA : Frameshift Variant	Achondrogenesis type 2	1429602	rs1289257741
GAA	Lysosomal degradation	chr17:80118690-80118694 (GRCh38.p12)	delAGGGA	GAA : Frameshift Variant	Hypochondrogenesis	1429602	rs1289257741
GAA	Lysosomal degradation	chr17:80117675 (GRCh38.p12)	C>T	GAA : Stop Gained	Glycogen storage disease type II (Pompe disease)	21940687	rs1344266804
GAA	Lysosomal degradation	chr17:80112643 (GRCh38.p12)	G>A	GAA : Missense Variant	Glycogen storage disease type II (Pompe disease)	18429042	rs1393386120
GAA	Lysosomal degradation	chr17:80112892 (GRCh38.p12)	C>A / C>T	GAA : Missense Variant	Glycogen storage disease type II (Pompe disease)	22644586	rs1414146587
GALNS	Lysosomal degradation	chr16:88841948 (GRCh38.p12)	G>A	GALNS : Missense Variant	Mucopolysaccharidosis IVA (Morchio A syndrome)	27774754	rs1028668536
GALNS	Lysosomal degradation	chr16:88841077 (GRCh38.p12)	T>A	GALNS : Missense Variant	Mucopolysaccharidosis IVA (Morchio A syndrome)	25433535	rs118204438
GALNS	Lysosomal degradation	chr16:88835794 (GRCh38.p12)	C>T	GALNS : Stop Gained	Mucopolysaccharidosis IVA (Morchio A syndrome)	12721840	rs118204449
GALNS	Lysosomal degradation	chr16:88837646 (GRCh38.p12)	T>C	GALNS : Missense Variant	Mucopolysaccharidosis IVA (Morchio A syndrome)	26276046	rs786205899
GALNS	Lysosomal degradation	chr16:88836222 (GRCh38.p12)	G>C	GALNS : Missense Variant	Mucopolysaccharidosis IVA (Morchio A syndrome)	1522213	rs118204435
GALNS	Lysosomal degradation	chr16:88841936 (GRCh38.p12)	G>A / G>C	GALNS : Missense Variant	Mucopolysaccharidosis IVA (Morchio A syndrome)	9298823	rs118204441
GALNS	Lysosomal degradation	chr16:88835335 (GRCh38.p12)	C>T	GALNS : Missense Variant	Mucopolysaccharidosis IVA (Morchio A syndrome)	9660054	rs118204442
GALNS	Lysosomal degradation	chr16:88832065 (GRCh38.p12)	G>C	GALNS : Missense Variant	Mucopolysaccharidosis IVA (Morchio A syndrome)	16287098	rs118204446
GALNS	Lysosomal degradation	chr16:88842772 (GRCh38.p12)	C>T	GALNS : Missense Variant	Mucopolysaccharidosis IVA (Morchio A syndrome)	12721840	rs118204447
GALNS	Lysosomal degradation	chr16:88835240 (GRCh38.p12)	C>A / C>T	GALNS : Missense Variant	Mucopolysaccharidosis IVA (Morchio A syndrome)	12721840	rs118204448
GALNS	Lysosomal degradation	chr16:88826822 (GRCh38.p12)	C>T	GALNS : Missense Variant	Mucopolysaccharidosis IVA (Morchio A syndrome)	20574428	rs267606838
GBA	Lysosomal degradation	chr1:155236246 (GRCh38.p12)	G>A	GBA : Missense Variant	Parkinson's disease	27094865	rs75548401
GBA	Lysosomal degradation	chr1:155235252 (GRCh38.p12)	A>C / A>G	GBA : Missense Variant	Gaucher disease	23719189	rs421016
GLA	Lysosomal degradation	chrX:101398467 (GRCh38.p12	C>A / C>T	GLA : Missense Variant	Fabry disease	31446751	rs104894828
GLA	Lysosomal degradation	chrX:101403846 (GRCh38.p12)	G>A	GLA : Missense Variant	Fabry disease	31446751	rs104894834
GLA	Lysosomal degradation	chrX:101401752 (GRCh38.p12)	C>A / C>G / C>T	GLA : Missense Variant	Fabry disease	29982630	rs104894845
GLA	Lysosomal degradation	chrX:101398942 (GRCh38.p12)	T>C	GLA : Missense Variant	Fabry disease	29294190	rs28935197
GLA	Lysosomal degradation	chrX:101403843 (GRCh38.p12)	A>G / A>T	GLA : Missense Variant	Fabry disease	31200018	rs869312142
GLB1	Lysosomal degradation	chr3:33068245 (GRCh38.p12)	G>A / G>T	GLB1 : Missense Variant	GM1 gangliosidosis	1907800	rs192732174
GLB1	Lysosomal degradation	chr3:33051989 (GRCh38.p12)	A>C	GLB1 : Missense Variant	GM1 gangliosidosis	26766614	rs376663785
GLB1	Lysosomal degradation	chr3:33068938-33068962 (GRCh38.p12)	dupCCAGGGCTCATGAAAGTTCCAGG	GLB1 : Frameshift	GM1 gangliosidosis	1606711	rs587776524
GLB1	Lysosomal degradation	chr3:33051766 (GRCh38.p12)	T>C	GLB1 : Missense Variant	GM1 gangliosidosis	1907800	rs72555361
GLB1	Lysosomal degradation	chr3:33068969 (GRCh38.p12)	A>C / A>G	GLB1 : Missense Variant	GM1 gangliosidosis	7586649	rs72555364
GLB1	Lysosomal degradation	chr3:33014292 (GRCh38.p12)	T>C	GLB1 : Missense Variant	GM1 gangliosidosis	11511921	rs72555368
GLB1	Lysosomal degradation	chr3:33072587 (GRCh38.p12)	G>A	GLB1 : Missense Variant	GM1 gangliosidosis	12644936	rs72555370
GLB1	Lysosomal degradation	chr3:33072637 (GRCh38.p12)	A>G / A>T	GLB1 : Missense Variant	GM1 gangliosidosis	1353343	rs72555390
GLB1	Lysosomal degradation	chr3:33072544 (GRCh38.p12)	G>A	GLB1 : Missense Variant	GM1 gangliosidosis	26766614	rs72555393
GLB1	Lysosomal degradation	chr3:33014213-33014218 (GRCh38.p12)	dupC	GLB1 : Frameshift	GM1 gangliosidosis	15986423	rs794729217
GLB1	Lysosomal degradation	chr3:33014263 (GRCh38.p12)	C>A	GLB1 : Missense Variant	Mucopolysaccharidosis IVB (Morchio B syndrome)	1928092	rs72555363
GLB1	Lysosomal degradation	chr3:33072613 (GRCh38.p12)	C>T	GLB1 : Missense Variant	GM1 gangliosidosis	17309651	rs72555392
GLB1	Lysosomal degradation	chr3:33051979 (GRCh38.p12)	C>A	GLB1 : Missense Variant	GM1 gangliosidosis	11511921	rs72555362
GLB1	Lysosomal degradation	chr3:33052000 (GRCh38.p12)	T>C	GLB1 : Missense Variant	GM1 gangliosidosis	24737316	rs1214295886
GLB1	Lysosomal degradation	chr3:32997112 (GRCh38.p12)	G>A	GLB1 : Missense Variant	Neuraminidase 1 deficiency	11279074	rs1356418704
GLB1	Lysosomal degradation	chr3:33014280 (GRCh38.p12)	insCT	GLB1 : Frameshift Variant	Mucopolysaccharidosis IVB (Morchio B syndrome)	11279074	rs1553606128
GLB1	Lysosomal degradation	chr3:33014280 (GRCh38.p12)	insCT	GLB1 : Frameshift Variant	GM1 gangliosidosis	17309651	rs1553606128
GLB1	Lysosomal degradation	chr3:33051951-33051952 (GRCh38.p12)	delG	GLB1 : Frameshift Variant	Mucopolysaccharidosis IVB (Morchio B syndrome)	21214877	rs1553610382
GLB1	Lysosomal degradation	chr3:33051951-33051952 (GRCh38.p12)	delG	GLB1 : Frameshift Variant	GM1 gangliosidosis	17309651	rs1553610382
GLB1	Lysosomal degradation	chr3:33053518 (GRCh38.p12)	C>G	GLB1 : Missense Variant	Mucopolysaccharidosis IVB (Morchio B syndrome)	23337983	rs1553610553
GLB1	Lysosomal degradation	chr3:33053518 (GRCh38.p12)	C>G	GLB1 : Missense Variant	GM1 gangliosidosis	25600812	rs1553610553
GLB1	Lysosomal degradation	chr3:33068821 (GRCh38.p12)	A>G	GLB1 : Missense Variant	GM1 gangliosidosis	25936995	rs1553612189
GLB1	Lysosomal degradation	chr3:33068968 (GRCh38.p12)	T>C	GLB1 : Missense Variant	Mucopolysaccharidosis IVB (Morchio B syndrome)	7586649	rs1553612220
GLB1	Lysosomal degradation	chr3:33051979-33051980 (GRCh38.p12)	CA>AG	GLB1 : Missense Variant	GM1 gangliosidosis	21497194	rs1559401428
GLB1	Lysosomal degradation	chr3:33058220 (GRCh38.p12)	C>T	GLB1 : Missense Variant	Mucopolysaccharidosis IVB (Morchio B syndrome)	16617000	rs189115557
GLB1	Lysosomal degradation	chr3:33058220 (GRCh38.p12)	C>T	GLB1 : Missense Variant	GM1 gangliosidosis	9203065	rs189115557
GLB1	Lysosomal degradation	chr3:33068245 (GRCh38.p12)	G>A / G>T	GLB1 : Missense Variant	Mucopolysaccharidosis IVB (Morchio B syndrome)	25936995	rs192732174
GLB1	Lysosomal degradation	chr3:33068245 (GRCh38.p12)	G>A / G>T	GLB1 : Missense Variant	GM1 gangliosidosis	15986423	rs192732174
GLB1	Lysosomal degradation	chr3:33002847 (GRCh38.p12)	T>C	GLB1 : Intron Variant	Respiratory Tract Diseases	30595370	rs9828592
GLB1	Lysosomal degradation	chr3:33068853 (GRCh38.p12)	C>A	GLB1 : Missense Variant	GM1 gangliosidosis	8213816	rs879050821
GLB1	Lysosomal degradation	chr3:33014213-33014218 (GRCh38.p12)	delC / dupC	GLB1 : Frameshift Variant	Mucopolysaccharidosis IVB (Morchio B syndrome)	10338095	rs794729217
GLB1	Lysosomal degradation	chr3:33014213-33014218 (GRCh38.p12)	delC / dupC	GLB1 : Frameshift Variant	GM1 gangliosidosis	10338095	rs794729217
GLB1	Lysosomal degradation	chr3:32997311 (GRCh38.p12)	G>A / G>T	GLB1 : Missense Variant	GM1 gangliosidosis	16941474	rs794727165
GLB1	Lysosomal degradation	chr3:32997311 (GRCh38.p12)	G>A / G>T	GLB1 : Missense Variant	Mucopolysaccharidosis IVB (Morchio B syndrome)	16941474	rs794727165
GLB1	Lysosomal degradation	chr3:33047293 (GRCh38.p12)	C>T	GLB1 : Intron Variant	Asthma	31619474	rs79337446
GLB1	Lysosomal degradation	chr3:33046194 (GRCh38.p12)	C>T	GLB1 : Missense Variant	GM1 gangliosidosis	10839995	rs781658798
GLB1	Lysosomal degradation	chr3:33068241 (GRCh38.p12)	G>A	GLB1 : Missense Variant	Mucopolysaccharidosis IVB (Morchio B syndrome)	17664528	rs778700089
GLB1	Lysosomal degradation	chr3:33068241 (GRCh38.p12)	G>A	GLB1 : Missense Variant	GM1 gangliosidosis	19472408	rs778700089
GLB1	Lysosomal degradation	chr3:33072543 (GRCh38.p12)	C>G / C>T	GLB1 : Splice Donor Variant	GM1 gangliosidosis	16941474	rs778423653
GLB1	Lysosomal degradation	chr3:33072543 (GRCh38.p12)	C>G / C>T	GLB1 : Splice Donor Variant	Mucopolysaccharidosis IVB (Morchio B syndrome)	18524657	rs778423653
GNS	Lysosomal degradation	chr12:64737039 (GRCh38.p12)	G>A	GNS : Stop Gained	Mucopolysaccharidosis type IIID (Sanfilippo syndrome)	12573255	rs119461974
GNS	Lysosomal degradation	chr12:64728988 (GRCh38.p12)	G>A	GNS : Stop Gained	Mucopolysaccharidosis type IIID (Sanfilippo syndrome)	17998446	rs119461975
GNS	Lysosomal degradation	chr12:64728987 (GRCh38.p12)	delT	GNS : Frameshift	Mucopolysaccharidosis type IIID (Sanfilippo syndrome)	12624138	rs483352898
GNS	Lysosomal degradation	chr12:64729017-64729018 (GRCh38.p12)	insAGGAC	GNS : Frameshift	Mucopolysaccharidosis type IIID (Sanfilippo syndrome)	17998446	rs483352899
GNS	Lysosomal degradation	chr12:64723088 (GRCh38.p12)	dupC	GNS : Frameshift	Mucopolysaccharidosis type IIID (Sanfilippo syndrome)	19650410	rs483352900
GRN	Lysosomal degradation	chr17:44352061 (GRCh38.p12)	C>A / C>T	GRN : Missense Variant	Presenile dementia	23624518	rs373885474
GRN	Lysosomal degradation	chr17:44349254-44349260 (GRCh38.p12)	dupCCTG	GRN : Frameshift	Frontotemporal lobar degeneration	16401619	rs606231220
GRN	Lysosomal degradation	chr17:44350263-44350269 (GRCh38.p12)	delCAGT	GRN : Frameshift	Frontotemporal lobar degeneration	16862116	rs63749801
GRN	Lysosomal degradation	chr17:44350251 (GRCh38.p12)	C>T	GRN : Stop Gained	Frontotemporal lobar degeneration	12476321	rs63750077
GRN	Lysosomal degradation	chr17:44349167 (GRCh38.p12)	G>A	GRN : Initiator Codon Variant	Frontotemporal lobar degeneration	16862115	rs63750331
GRN	Lysosomal degradation	chr17:44349166 (GRCh38.p12)	T>C	GRN : Initiator Codon Variant	Frontotemporal lobar degeneration	16862116	rs63751006
GRN	Lysosomal degradation	chr17:44352404 (GRCh38.p12)	C>T	GRN : Stop Gained	Frontotemporal lobar degeneration	16950801	rs63751294
GRN	Lysosomal degradation	chr17:44349190 (GRCh38.p12)	C>A / C>T	GRN : Missense Variant	Frontotemporal lobar degeneration	17984093	rs63751243
GUSB	Lysosomal degradation	chr7:65967863 (GRCh38.p12)	C>T	GUSB : Stop Gained	Mucopolysaccharidosis type VII (Sly syndrome)	7633414	rs121918179
GUSB	Lysosomal degradation	chr7:65979782 (GRCh38.p12)	G>A	GUSB : Missense Variant	Mucopolysaccharidosis type VII (Sly syndrome)	19224584	rs121918181
GUSB	Lysosomal degradation	chr7:65974701 (GRCh38.p12)	G>A	GUSB : Stop Gained	Mucopolysaccharidosis type VII (Sly syndrome)	7680524	rs121918185
GUSB	Lysosomal degradation	chr7:65967767 (GRCh38.p12)	G>A	GUSB : Synonymous Variant	Mucopolysaccharidosis type VII (Sly syndrome)	7633414	rs377519272
GUSB	Lysosomal degradation	chr7:65973676-65973677 (GRCh38.p12)	delGA	GUSB : Intron Variant	Mucopolysaccharidosis type VII (Sly syndrome)	9490302	rs786200863
GUSB	Lysosomal degradation	chr7:65974348 (GRCh38.p12)	C>T	GUSB : Stop Gained	Mucopolysaccharidosis type VII (Sly syndrome)	9490302	rs121918180
GUSB	Lysosomal degradation	chr7:65974626 (GRCh38.p12)	G>A	GUSB : Missense Variant	Mucopolysaccharidosis type VII (Sly syndrome)	1702266	rs121918173
GUSB	Lysosomal degradation	chr7:65979477 (GRCh38.p12)	G>A	GUSB : Missense Variant	Mucopolysaccharidosis type VII (Sly syndrome)	8111412	rs121918174
GUSB	Lysosomal degradation	chr7:65974923 (GRCh38.p12)	G>A	GUSB : Missense Variant	Mucopolysaccharidosis type VII (Sly syndrome)	8111413	rs121918175
GUSB	Lysosomal degradation	chr7:65974923 (GRCh38.p12)	G>A	GUSB : Missense Variant	Mucopolysaccharidosis type VII (Sly syndrome)	8111413	rs121918176
GUSB	Lysosomal degradation	chr7:65979866 (GRCh38.p12)	G>A	GUSB : Missense Variant	Mucopolysaccharidosis type VII (Sly syndrome)	7633414	rs121918177
GUSB	Lysosomal degradation	chr7:65967900 (GRCh38.p12)	T>C	GUSB : Missense Variant	Mucopolysaccharidosis type VII (Sly syndrome)	7633414	rs121918178
GUSB	Lysosomal degradation	chr7:65974934 (GRCh38.p12)	C>G / C>T	GUSB : Missense Variant	Mucopolysaccharidosis type VII (Sly syndrome)	12522561	rs121918182
GUSB	Lysosomal degradation	chr7:65964382 (GRCh38.p12)	C>A	GUSB : Missense Variant	Mucopolysaccharidosis type VII (Sly syndrome)	12522561	rs121918183
GUSB	Lysosomal degradation	chr7:65960972 (GRCh38.p12)	C>A	GUSB : Missense Variant	Mucopolysaccharidosis type VII (Sly syndrome)	11226217	rs121918184
GUSB	Lysosomal degradation	chr7:65960997 (GRCh38.p12)	G>A	GUSB : Missense Variant	Mucopolysaccharidosis type VII (Sly syndrome)	1702266	rs121918172
HGS/HRS	Autophagosome-lysosome fusion	chr17:81696901 (GRCh38.p12)	T>C	HGS : Synonymous Variant	Age-related macular degeneration	24439028	rs8070488
HGSNAT	Lysosomal degradation	chr8:43173740 (GRCh38.p12)	C>T	HGSNAT : Missense Variant	Mucopolysaccharidosis type IIIC (Sanfilippo syndrome type C)	17033958	rs121908282
HGSNAT	Lysosomal degradation	chr8:43178184 (GRCh38.p12)	T>G	HGSNAT : Stop Gained	Mucopolysaccharidosis type IIIC (Sanfilippo syndrome type C)	17033958	rs121908283
HGSNAT	Lysosomal degradation	chr8:43193824 (GRCh38.p12)	T>A	HGSNAT : Missense Variant	Mucopolysaccharidosis type IIIC (Sanfilippo syndrome type C)	17033958	rs121908284
HGSNAT	Lysosomal degradation	chr8:43182162 (GRCh38.p12)	C>T	HGSNAT : Missense Variant	Mucopolysaccharidosis type IIIC (Sanfilippo syndrome type C)	19479962	rs121908285
HGSNAT	Lysosomal degradation	chr8:43197682 (GRCh38.p12)	C>T	HGSNAT : Missense Variant	Mucopolysaccharidosis type IIIC (Sanfilippo syndrome type C)	20825431	rs121908286
HGSNAT	Lysosomal degradation	chr8:43159045 (GRCh38.p12)	G>A	HGSNAT : Splice Donor Variant	Mucopolysaccharidosis type IIIC (Sanfilippo syndrome type C)	16960811	rs193066451
HGSNAT	Lysosomal degradation	chr8:43158921 (GRCh38.p12)	A>G	HGSNAT : Splice Acceptor Variant	Mucopolysaccharidosis type IIIC (Sanfilippo syndrome type C)	20825431	rs483352896
HGSNAT	Lysosomal degradation	chr8:43193790 (GRCh38.p12)	G>A	HGSNAT : Missense Variant	Mucopolysaccharidosis type IIIC (Sanfilippo syndrome type C)	19823584	rs753355844
HGSNAT	Lysosomal degradation	chr8:43158710 (GRCh38.p12)	A>T	HGSNAT : Missense Variant	Mucopolysaccharidosis type IIIC (Sanfilippo syndrome type C)	25859010	rs754875934
HGSNAT	Lysosomal degradation	chr8:43191554 (GRCh38.p12)	G>T	HGSNAT : Missense Variant	Mucopolysaccharidosis type IIIC (Sanfilippo syndrome type C)	17033958	rs764206492
HGSNAT	Lysosomal degradation	chr8:43158949 (GRCh38.p12)	G>C	HGSNAT : Missense Variant	Mucopolysaccharidosis type IIIC (Sanfilippo syndrome type C)	25859010	rs797045120
HSL/LIPE	Selective autophagy receptor	chr19:42401822-42401858 (GRCh38.p12)	delA(C)5GCAG(C)5GTCT/dupA(C)5GCAG(C)5GTCT	LIPE : Frameshift Variant	Familial partial lipodystrophy	25475467	rs587777699
HSL/LIPE	Selective autophagy receptor	chr19:42401940 (GRCh38.p12)	C>A / C>T	LIPE : Stop Gained	Lipodystrophy	27862896	rs766817317
HTT	Selective autophagy receptor	chr4:3131662 (GRCh38.p12	G>A	HTT : Missense Variant	Hungtinton's disease	19022249	rs1210554604
HTT	Selective autophagy receptor	chr4:3107715 (GRCh38.p12)	A>G	HTT : Intron Variant	Hungtinton's disease	22387017	rs10015979
HTT	Selective autophagy receptor	chr4:3223751 (GRCh38.p12)	T>C	HTT : Intron Variant	Hungtinton's disease	22387017	rs110501
HTT	Selective autophagy receptor	Chr4:3150086 (GRCh38.p12)	C>G / C>T	HTT : Intron Variant	Hungtinton's disease	22387017	rs11731237
HTT	Selective autophagy receptor	chr4:3116389 (GRCh38.p12)	T>A / T>G	HTT : Intron Variant	Hungtinton's disease	22387017	rs2071655
HTT	Selective autophagy receptor	chr4:3237975 (GRCh38.p12)	C>T	HTT : Intron Variant	Hungtinton's disease	22387017	rs2269499
HTT	Selective autophagy receptor	chr4:3087532 (GRCh38.p12)	A>C / A>G / A>T	HTT : Intron Variant	Hungtinton's disease	22387017	rs2285086
HTT	Selective autophagy receptor	chr4:3184517 (GRCh38.p12)	A>C / A>G / A>T	HTT : Intron Variant	Hungtinton's disease	22387017	rs2298969
HTT	Selective autophagy receptor	chr4:3042708 (GRCh38.p12	G>A	Unknown	Hungtinton's disease	22387017	rs2471347
HTT	Selective autophagy receptor	chr4:3233253 (GRCh38.p12)	G>A / G>T	HTT : Missense Variant	Hungtinton's disease	22387017	rs362272
HTT	Selective autophagy receptor	chr4:3134226 (GRCh38.p12)	T>A / T>C / T>G	HTT : Intron Variant	Hungtinton's disease	22387017	rs363066
HTT	Selective autophagy receptor	Chr4:3194302 (GRCh38.p12)	A>C / A>T	HTT : Intron Variant	Hungtinton's disease	22387017	rs363092
HTT	Selective autophagy receptor	chr4:3178294 (GRCh38.p12)	T>C	HTT : Intron Variant	Hungtinton's disease	22387017	rs363096
HTT	Selective autophagy receptor	chr4:3078446 (GRCh38.p12)	G>A / G>C	HTT : Intron Variant	Hungtinton's disease	22387017	rs3856973
HTT	Selective autophagy receptor	chr4:3146549 (GRCh38.p12)	G>A	HTT : Intron Variant	Hungtinton's disease	22387017	rs6855981
HTT	Selective autophagy receptor	chr4:3223662 (GRCh38.p12)	A>C / A>G / A>T	HTT : Intron Variant	Hungtinton's disease	22387017	rs82333
HTT	Selective autophagy receptor	chr4:3215088 (GRCh38.p12)	C>G	HTT : Intron Variant	Hungtinton's disease	22387017	rs916171
HTT	Selective autophagy receptor	chr4:3127513 (GRCh38.p12)	G>A	HTT : Missense Variant	Hungtinton's disease	29802276	rs118005095
HTT	Selective autophagy receptor	chr4:3074678 (GRCh38.p12)	G>A	HTT : 2KB Upstream Variant	Hungtinton's disease	25938884	rs13102260
HYAL1	Lysosomal degradation	chr3:50302155 (GRCh38.p12)	C>T	HYAL1 : Missense Variant	Mucopolysaccharidosis IX	10339581	rs104893743
IDS	Lysosomal degradation	chrX:149482996 (GRCh38.p12)	C>A / C>G / C>T	IDS : Missense Variant	Mucopolysaccharidosis type II (Hunter syndrome)	9501270	rs113993946
IDS	Lysosomal degradation	chrX:149498308 (GRCh38.p12)	C>G / C>T	IDS : Splice Acceptor Variant	Mucopolysaccharidosis type II (Hunter syndrome)	26762690	rs113993947
IDS	Lysosomal degradation	chrX:149482974 (GRCh38.p12)	C>T	IDS : Stop Gained	Mucopolysaccharidosis type II (Hunter syndrome)	1303211	rs199422230
IDS	Lysosomal degradation	chrX:149498305-149498307 (GRCh38.p12)	delGT	IDS : Frameshift	Mucopolysaccharidosis type II (Hunter syndrome)	1303211	rs483352904
IDS	Lysosomal degradation	chrX:149503379-149503382 (GRCh38.p12)	delGAG	IDS : Inframe Deletion	Mucopolysaccharidosis type II (Hunter syndrome)	11731225	rs483352905
IDS	Lysosomal degradation	chrX:149504189-149504191 (GRCh38.p12)	dupG	IDS : Frameshift	Mucopolysaccharidosis type II (Hunter syndrome)	9950361	rs797044671
IDS	Lysosomal degradation	chrX:149500992-149500993 (GRCh38.p12)	delAAinsCCAGCTATACGG	IDS : Frameshift	Mucopolysaccharidosis type II (Hunter syndrome)	26762690	rs869025304
IDS	Lysosomal degradation	chrX:149496458-149496474 (GRCh38.p12)	delACCTCGGGATCGGG	IDS : Stop Gained	Mucopolysaccharidosis type II (Hunter syndrome)	26762690	rs869025305
IDS	Lysosomal degradation	chrX:149486972-149486975 (GRCh38.p12)	delAA	IDS : Frameshift	Mucopolysaccharidosis type II (Hunter syndrome)	26762690	rs869025306
IDS	Lysosomal degradation	chrX:149482936 (GRCh38.p12)	delA	IDS : Frameshift	Mucopolysaccharidosis type II (Hunter syndrome)	26762690	rs869025307
IDS	Lysosomal degradation	chrX:149490313 (GRCh38.p12)	C>A	IDS : Splice Donor Variant	Mucopolysaccharidosis type II (Hunter syndrome)	26762690	rs869025308
IDS	Lysosomal degradation	chrX:149500977 (GRCh38.p12)	G>C / G>T	IDS : Missense Variant	Mucopolysaccharidosis type II (Hunter syndrome)	1639384	rs104894856
IDS	Lysosomal degradation	chrX:149503326 (GRCh38.p12)	T>C	IDS : Missense Variant	Mucopolysaccharidosis type II (Hunter syndrome)	1303211	rs104894861
IDS	Lysosomal degradation	chrX:149482894 (GRCh38.p12)	C>G	IDS : Missense Variant	Mucopolysaccharidosis type II (Hunter syndrome)	1639384	rs199422228
IDS	Lysosomal degradation	chrX:149483135 (GRCh38.p12)	A>C	IDS : Missense Variant	Mucopolysaccharidosis type II (Hunter syndrome)	1303211	rs199422229
IDS	Lysosomal degradation	chrX:149482997 (GRCh38.p12)	G>A	IDS : Missense Variant	Mucopolysaccharidosis type II (Hunter syndrome)	28077157	rs199422231
IDUA	Lysosomal degradation	chr4:1002747 (GRCh38.p12)	G>A	IDUA : Stop Gained	Mucopolysaccharidosis type I (Hurler syndrome)	24368159	rs121965019
IDUA	Lysosomal degradation	chr4:1002117 (GRCh38.p12)	C>T	IDUA : Stop Gained	Mucopolysaccharidosis type I (Hurler syndrome)	8554071	rs121965023
IDUA	Lysosomal degradation	chr4:1004292 (GRCh38.p12)	C>G / C>T	IDUA : Stop Gained	Mucopolysaccharidosis type I (Hurler syndrome)	7951228	rs121965025
IDUA	Lysosomal degradation	chr4:1002087 (GRCh38.p12)	G>A	IDUA : Missense Variant	Mucopolysaccharidosis type I (Hurler syndrome)	8554071	rs121965030
IDUA	Lysosomal degradation	chr4:1002333 (GRCh38.p12)	T>G	IDUA : Missense Variant	Mucopolysaccharidosis type I (Hurler syndrome)	10735634	rs121965033
IDUA	Lysosomal degradation	chr4:1002275 (GRCh38.p12)	G>C	IDUA : Missense Variant	Mucopolysaccharidosis type I (Hurler syndrome)	27896125	rs199801029
IDUA	Lysosomal degradation	chr4:1004391 (GRCh38.p12)	T>G	IDUA : Stop Lost	Mucopolysaccharidosis type I (Hurler syndrome)	7550232	rs387906504
IDUA	Lysosomal degradation	chr4:1004083 (GRCh38.p12)	delC	IDUA : Stop Gained	Mucopolysaccharidosis type I (Hurler syndrome)	22976768	rs398123258
IDUA	Lysosomal degradation	chr4:1001672 (GRCh38.p12)	G>A / G>C	IDUA : Intron Variant	Mucopolysaccharidosis type I (Hurler syndrome)	8213840	rs762411583
IDUA	Lysosomal degradation	chr4:1002325 (GRCh38.p12)	C>A / C>G	IDUA : Stop Gained	Mucopolysaccharidosis type I (Hurler syndrome)	8213840	rs764196171
IDUA	Lysosomal degradation	chr4:1001701-1001706 (GRCh38.p12)	dupTGCTC	IDUA : Frameshift	Mucopolysaccharidosis type I (Hurler syndrome)	10466419	rs786200915
IDUA	Lysosomal degradation	chr4:1001742 (GRCh38.p12)	T>C	IDUA : Missense Variant	Mucopolysaccharidosis type I (Hurler syndrome)	20301341	rs869025584
IDUA	Lysosomal degradation	chr4:1002747 (GRCh38.p12)	G>A	IDUA : Stop Gained	Mucopolysaccharidosis type I (Hurler syndrome)	24368159	rs121965019
IDUA	Lysosomal degradation	chr4:1003418 (GRCh38.p12)	C>G / C>T	IDUA : Missense Variant	Mucopolysaccharidosis type I (Hurler syndrome)	9427149	rs121965021
IDUA	Lysosomal degradation	chr4:1002392 (GRCh38.p12)	A>C	IDUA : Missense Variant	Mucopolysaccharidosis type I (Hurler syndrome)	8328452	rs121965024
IDUA	Lysosomal degradation	chr4:1003108 (GRCh38.p12)	G>A / G>C	IDUA : Missense Variant	Mucopolysaccharidosis type I (Hurler syndrome)	7550232	rs121965026
IDUA	Lysosomal degradation	chr4:1003102 (GRCh38.p12)	T>C	IDUA : Missense Variant	Mucopolysaccharidosis type I (Hurler syndrome)	7550232	rs121965027
IDUA	Lysosomal degradation	chr4:1004286 (GRCh38.p12)	C>A / C>G / C>T	IDUA : Stop Gained	Mucopolysaccharidosis type I (Hurler syndrome)	9391892	rs121965031
IDUA	Lysosomal degradation	chr4:1002333 (GRCh38.p12)	T>G	IDUA : Missense Variant	Mucopolysaccharidosis type I (Hurler syndrome)	10735634	rs121965033
IDUA	Lysosomal degradation	chr4:1003418 (GRCh38.p12)	C>G / C>T	IDUA : Missense Variant	Mucopolysaccharidosis type I (Hurler syndrome)	10735634	rs121965021
IRGM	Membrane elongation	chr5:150848436 (GRCh38.p12)	C>T	IRGM : Synonymous Variant	Crohn's Disease	19174780	rs10065172
IRGM	Membrane elongation	chr5:150848436 (GRCh38.p12)	C>T	IRGM : Synonymous Variant	Systemic lupus erythematosus	21622776	rs10065172
IRGM	Membrane elongation	chr5:150843825 (GRCh38.p12)	T>C	Unknown	Systemic lupus erythematosus	21622776	rs13361189
IRGM	Membrane elongation	chr5:150860514 (GRCh38.p12)	C>T	IRGM : Intron Variant	Ulcerative Colitis	19098858	rs1000113
IRGM	Membrane elongation	chr5:150860514 (GRCh38.p12)	C>T	IRGM : Intron Variant	Crohn's Disease	17554300	rs1000113
IRGM	Membrane elongation	chr5:150847077 (GRCh38.p12)	T>C	IRGM : 5 Prime UTR Variant	Tuberculosis	26980495	rs10051924
IRGM	Membrane elongation	chr5:150848436 (GRCh38.p12)	C>A / C>T	IRGM : Missense Variant	Celiac Disease	19683022	rs10065172
IRGM	Membrane elongation	chr5:150848436 (GRCh38.p12)	C>A / C>T	IRGM : Missense Variant	Inflammatory Bowel Diseases	21508684	rs10065172
IRGM	Membrane elongation	chr5:150848436 (GRCh38.p12)	C>A / C>T	IRGM : Missense Variant	Ankylosing spondylitis	28031552	rs10065172
IRGM	Membrane elongation	chr5:150848436 (GRCh38.p12)	C>A / C>T	IRGM : Missense Variant	Crohn's Disease	25526194	rs10065172
IRGM	Membrane elongation	chr5:150879305 (GRCh38.p12)	A>G	IRGM : Intron Variant	Arthritis	31654602	rs11747270
IRGM	Membrane elongation	chr5:150879305 (GRCh38.p12)	A>G	IRGM : Intron Variant	Ulcerative Colitis	25191865	rs11747270
IRGM	Membrane elongation	chr5:150879305 (GRCh38.p12)	A>G	IRGM : Intron Variant	Chronic Periodontitis	28983640	rs11747270
IRGM	Membrane elongation	chr5:150879305 (GRCh38.p12)	A>G	IRGM : Intron Variant	Asthma	21150878	rs11747270
IRGM	Membrane elongation	chr5:150879305 (GRCh38.p12)	A>G	IRGM : Intron Variant	Multiple Sclerosis	22190364	rs11747270
IRGM	Membrane elongation	chr5:150879305 (GRCh38.p12)	A>G	IRGM : Intron Variant	Crohn's Disease	18587394	rs11747270
IRGM	Membrane elongation	chr5:150849504 (GRCh38.p12)	T>C	IRGM : Intron Variant	Cholangitis	26974007	rs11749391
IRGM	Membrane elongation	chr5:150849504 (GRCh38.p12)	T>C	IRGM : Intron Variant	Ulcerative Colitis	26974007	rs11749391
IRGM	Membrane elongation	chr5:150849504 (GRCh38.p12)	T>C	IRGM : Intron Variant	Crohn's Disease	26974007	rs11749391
IRGM	Membrane elongation	chr5:150849504 (GRCh38.p12)	T>C	IRGM : Intron Variant	Psoriasis vulgaris	26974007	rs11749391
IRGM	Membrane elongation	chr5:150849504 (GRCh38.p12)	T>C	IRGM : Intron Variant	Ankylosing spondylitis	26974007	rs11749391
IRGM	Membrane elongation	chr5:150846533 (GRCh38.p12)	A>C / A>G / A>T	IRGM : 5 Prime UTR Variant	Tuberculosis	24595493	rs12654043
IRGM	Membrane elongation	chr5:150848174 (GRCh38.p12)	G>A / G>C / G>T	IRGM : Missense Variant	Ulcerative Colitis	25191865	rs180802994
IRGM	Membrane elongation	chr5:150848174 (GRCh38.p12)	G>A / G>C / G>T	IRGM : Missense Variant	Crohn's Disease	25191865	rs180802994
IRGM	Membrane elongation	chr5:150845362 (GRCh38.p12)	T>C / T>G	IRGM : 2KB Upstream Variant	Crohn's Disease	29178192	rs4958843
IRGM	Membrane elongation	chr5:150845362 (GRCh38.p12)	T>C / T>G	IRGM : 2KB Upstream Variant	Tuberculosis	29178192	rs4958843
IRGM	Membrane elongation	chr5:150860025 (GRCh38.p12)	G>A	IRGM : Intron Variant	Arthritis	31654602	rs4958847
IRGM	Membrane elongation	chr5:150860025 (GRCh38.p12)	G>A	IRGM : Intron Variant	Pathologic fistula	19098858	rs4958847
IRGM	Membrane elongation	chr5:150860025 (GRCh38.p12)	G>A	IRGM : Intron Variant	Inflammatory Bowel Diseases	18580884	rs4958847
IRGM	Membrane elongation	chr5:150860025 (GRCh38.p12)	G>A	IRGM : Intron Variant	Malignant neoplasm of stomach	22713085	rs4958847
IRGM	Membrane elongation	chr5:150860025 (GRCh38.p12)	G>A	IRGM : Intron Variant	Non-alcoholic Fatty Liver Disease	29788077	rs4958847
IRGM	Membrane elongation	chr5:150860025 (GRCh38.p12)	G>A	IRGM : Intron Variant	Ulcerative Colitis	24232856	rs4958847
IRGM	Membrane elongation	chr5:150860025 (GRCh38.p12)	G>A	IRGM : Intron Variant	Crohn's Disease	18580884	rs4958847
IRGM	Membrane elongation	chr5:150848404 (GRCh38.p12)	C>A / C>T	IRGM : Missense Variant	Tuberculosis	29068986	rs72553867
IRGM	Membrane elongation	chr5:150848404 (GRCh38.p12)	C>A / C>T	IRGM : Missense Variant	Crohn's Disease	22508677	rs72553867
IRGM	Membrane elongation	chr5:150890858 (GRCh38.p12)	A>G	IRGM : Intron Variant	Crohn's Disease	21102463	rs7714584
IRGM	Membrane elongation	chr5:150847863 (GRCh38.p12)	C>T	IRGM : 5 Prime UTR Variant	Crohn's Disease	25191865	rs9637876
KIF5B	Autophagosome-lysosome fusion	chr10:32020077 (GRCh38.p12)	A>G	KIF5B : Intron Variant	Bipolar disorder	23092984	rs1775715
LAMP2	Lysosomal degradation	chrX:120449006 (GRCh38.p12)	G>A	LAMP2 : Stop Gained	Danon disease	15253947	rs104894857
LAMP2	Lysosomal degradation	chrX:120442599 (GRCh38.p12)	C>T	LAMP2 : Missense Variant	Danon disease	15673802	rs104894858
LAMP2	Lysosomal degradation	chrX:120448978-120448980 (GRCh38.p12)	delCTCinsTA	LAMP2 : Frameshift	Danon disease	21415759	rs1060502302
LAMP2	Lysosomal degradation	chrX:120449086 (GRCh38.p12)	A>T	LAMP2 : Stop Gained	Danon disease	10972294	rs137852527
LAMP2	Lysosomal degradation	chrX:120442650 (GRCh38.p12)	G>A / G>T	LAMP2 : Stop Gained	Danon disease	22695892	rs727503118
LAMP2	Lysosomal degradation	chrX:120446304 (GRCh38.p12)	C>A / C>T	LAMP2 : Splice Donor Varian	Danon disease	24033266	rs727503119
LAMP2	Lysosomal degradation	chrX:120456650 (GRCh38.p12)	C>T	LAMP2 : Splice Donor Variant	Danon disease	21415759	rs727503120
LAMP2	Lysosomal degradation	chrX:120441729 (GRCh38.p12	C>T	LAMP2 : Splice Donor Variant	Danon disease	18990578	rs727504742
MAN2B1	Lysosomal degradation	chr19:12649418 (GRCh38.p12)	G>A	MAN2B1 : Stop Gained	Alpha-mannosidosis	9758606	rs121434331
MAN2B1	Lysosomal degradation	chr19:12652376 (GRCh38.p12)	G>A	MAN2B1 : Stop Gained	Alpha-mannosidosis	9758606	rs121434332
MAN2B1	Lysosomal degradation	chr19:12657482 (GRCh38.p12)	G>A / G>C / G>T	MAN2B1 : Stop Gained	Alpha-mannosidosis	19958498	rs775200333
MAN2B1	Lysosomal degradation	chr19:12655693 (GRCh38.p12)	C>G	MAN2B1 : Splice Donor Variant	Alpha-mannosidosis	26048034	rs80338677
MAN2B1	Lysosomal degradation	chr19:12652462 (GRCh38.p12)	T>C	MAN2B1 : Splice Acceptor Variant	Alpha-mannosidosis	9915946	rs80338678
MAN2B1	Lysosomal degradation	chr19:12650103 (GRCh38.p12)	C>T	MAN2B1 : Splice Donor Variant	Alpha-mannosidosis	9915946	rs80338679
MAN2B1	Lysosomal degradation	chr19:12649932 (GRCh38.p12)	G>A / G>C / G>T	MAN2B1 : Missense Variant	Alpha-mannosidosis	26048034	rs80338680
MAN2B1	Lysosomal degradation	chr19:12649146 (GRCh38.p12)	A>G	MAN2B1 : Missense Variant	Alpha-mannosidosis	22161967	rs80338681
MANBA	Lysosomal degradation	chr4:102657873 (GRCh38.p12)	A>G	MANBA : Missense Variant	Beta-mannosidosis	18565776	rs121434334
MANBA	Lysosomal degradation	chr4:102726614 (GRCh38.p12)	C>A / C>T	MANBA : Stop Gained	Beta-mannosidosis	12468273	rs121434335
MANBA	Lysosomal degradation	chr4:102669004 (GRCh38.p12)	G>A / G>C	MANBA : Stop Gained	Beta-mannosidosis	12468273	rs121434336
MAP1LC3A	Membrane elongation	chr20:34558028 (GRCh38.p12)	C>A / C>G	MAP1LC3A : Intron Variant	Chronic Q fever	30616015	rs1040747
MAP1LC3A	Membrane elongation	chr20:34545113 (GRCh38.p12)	C>G / C>T	MAP1LC3A : 2KB Upstream Variant	Coronary artery disease	30908504	rs2424994
MAP1LC3B	Membrane elongation	chr16:87403114 (GRCh38.p12)	G>C / G>T	MAP1LC3B : 3 Prime UTR Variant	Myopia	32231278	rs1054521
MAP1LC3B-FBXO31	Membrane elongation	chr16:87381644 (GRCh38.p12)	T>A / T>C / T>G	FBXO31 : Intron Variant	Systemic lupus erythematosus	29044928	rs933717
MFSD8	Lysosomal degradation	chr4:127930787 (GRCh38.p12)	A>C / A>G	MFSD8 : Stop Gained	Neuronal Ceroid Lipofuscinosis Type 7	17564970	rs118203977
MFSD8	Lysosomal degradation	chr4:127932984 (GRCh38.p12)	C>G / C>T	MFSD8 : Splice Donor Variant	Late-Infantile Neuronal Ceroid Lipfuscinosis	24033266	rs200319160
MFSD8	Lysosomal degradation	chr4:127938781 (GRCh38.p12)	A>T	MFSD8 : Splice Donor Variant	Neuronal Ceroid Lipofuscinosis Type 7	17564970	rs587778809
MFSD8	Lysosomal degradation	chr4:127920743 (GRCh38.p12)	G>A	MFSD8 : Stop Gained	Neuronal Ceroid Lipofuscinosis Type 7	19177532	rs724159971
MFSD8	Lysosomal degradation	chr4:127932981-127932982 (GRCh38.p12)	insA	MFSD8 : Intron Variant	Neuronal Ceroid Lipofuscinosis Type 7	19177532	rs727502801
MFSD8	Lysosomal degradation	chr4:127930752 (GRCh38.p12)	C>T	MFSD8 : Missense Variant	Neuronal Ceroid Lipofuscinosis Type 7	19177532	rs118203975
MFSD8	Lysosomal degradation	chr4:127921588 (GRCh38.p12)	C>T	MFSD8 : Missense Variant	Neuronal Ceroid Lipofuscinosis Type 7	17564970	rs118203976
MFSD8	Lysosomal degradation	chr4:127930800 (GRCh38.p12)	G>A / G>T	MFSD8 : Missense Variant	Neuronal Ceroid Lipofuscinosis Type 7	19201763	rs140948465
MFSD8	Lysosomal degradation	chr4:127921639 (GRCh38.p12)	G>A	MFSD8 : Missense Variant	Neuronal Ceroid Lipofuscinosis Type 7	19277732	rs267607235
MFSD8	Lysosomal degradation	chr4:127943775 (GRCh38.p12)	C>A / C>T	MFSD8 : Missense Variant	Neuronal Ceroid Lipofuscinosis Type 7	28708303	rs749704755
NAGLU	Lysosomal degradation	chr17:42543882 (GRCh38.p12)	C>G / C>T	NAGLU: Stop Gained	Mucopolysaccharidosis type IIIB (Sanfilippo syndrome type B)	8650226	rs104894591
NAGLU	Lysosomal degradation	chr17:42541074 (GRCh38.p12)	C>T	NAGLU : Stop Gained	Mucopolysaccharidosis type IIIB (Sanfilippo syndrome type B)	26907177	rs104894592
NAGLU	Lysosomal degradation	chr17:42543699 (GRCh38.p12)	C>T	NAGLU : Missense Variant	Mucopolysaccharidosis type IIIB (Sanfilippo syndrome type B)	25466957	rs104894597
NAGLU	Lysosomal degradation	chr17:42543700 (GRCh38.p12)	G>A / G>C / G>T	NAGLU : Missense Variant	Mucopolysaccharidosis type IIIB (Sanfilippo syndrome type B)	23380547	rs104894598
NAGLU	Lysosomal degradation	chr17:42541127 (GRCh38.p12)	C>G	NAGLU : Missense Variant	Mucopolysaccharidosis type IIIB (Sanfilippo syndrome type B)	12202988	rs118204025
NAGLU	Lysosomal degradation	chr17:42543997 (GRCh38.p12)	C>T	NAGLU : Missense Variant	Mucopolysaccharidosis type IIIB (Sanfilippo syndrome type B)	25818867	rs746006696
NAGLU	Lysosomal degradation	chr17:42537494 (GRCh38.p12)	delT	NAGLU : Frameshift	Mucopolysaccharidosis type IIIB (Sanfilippo syndrome type B)	28844463	rs886039894
NAGLU	Lysosomal degradation	chr17:42543950 (GRCh38.p12)	dupG	NAGLU : Frameshift	Mucopolysaccharidosis type IIIB (Sanfilippo syndrome type B)	28844463	rs886039895
NAGLU	Lysosomal degradation	chr17:42536414 (GRCh38.p12)	T>C	NAGLU : Missense Variant	Mucopolysaccharidosis type IIIB (Sanfilippo syndrome type B)	11068184	rs118204024
NAGLU	Lysosomal degradation	chr17:42544027 (GRCh38.p12)	G>A / G>T	NAGLU : Missense Variant	Mucopolysaccharidosis type IIIB (Sanfilippo syndrome type B)	8650226	rs104894590
NAGLU	Lysosomal degradation	chr17:42543934 (GRCh38.p12)	G>A	NAGLU : Missense Variant	Mucopolysaccharidosis type IIIB (Sanfilippo syndrome type B)	8650226	rs104894593
NAGLU	Lysosomal degradation	chr17:42543933 (GRCh38.p12)	C>A / C>T	NAGLU : Missense Variant	Mucopolysaccharidosis type IIIB (Sanfilippo syndrome type B)	10094189	rs104894594
NAGLU	Lysosomal degradation	chr17:42543568 (GRCh38.p12)	C>T	NAGLU : Missense Variant	Mucopolysaccharidosis type IIIB (Sanfilippo syndrome type B)	10094189	rs104894595
NAGLU	Lysosomal degradation	chr17:42543699 (GRCh38.p12)	C>T	NAGLU : Missense Variant	Mucopolysaccharidosis type IIIB (Sanfilippo syndrome type B)	10094189	rs104894597
NAGLU	Lysosomal degradation	chr17:42543700 (GRCh38.p12)	G>A / G>C / G>T	NAGLU : Missense Variant	Mucopolysaccharidosis type IIIB (Sanfilippo syndrome type B)	10094189	rs104894598
NAGLU	Lysosomal degradation	chr17:42537433 (GRCh38.p12)	A>G	NAGLU : Missense Variant	Mucopolysaccharidosis type IIIB (Sanfilippo syndrome type B)	14984474	rs753520553
NAGLU	Lysosomal degradation	chr17:42543214 (GRCh38.p12)	T>C	NAGLU : Missense Variant	Mucopolysaccharidosis type IIIB (Sanfilippo syndrome type B)	25818867	rs796052122
NAGLU	Lysosomal degradation	chr17:42538691 (GRCh38.p12)	C>T	NAGLU : Missense Variant	Mucopolysaccharidosis type IIIB (Sanfilippo syndrome type B)	18218046	rs104894601
NBR1	Selective autophagy receptor	chr17:43191425 (GRCh38.p12)	G>A	NBR1 : Missense Variant	Brooke-Spiegler syndrome	32744342	rs202122812
NCOA4	Selective autophagy receptor	chr10:46025670 (GRCh38.p12)	C>T	NCOA4 : Intron Variant	Prostate cancer	20717903	rs10740051
NCOA4	Selective autophagy receptor	chr10:46027444 (GRCh38.p12)	A>C	NCOA4 : Missense Variant	Prostate cancer	20717903	rs10761581
NCOA4	Selective autophagy receptor	chr10:46009499 (GRCh38.p12)	T>C	NCOA4 : Missense Variant	Papillary thyroid carcinoma	17464312	rs782237788
NDP52	Selective autophagy receptor	chr17:48852546 (GRCh38.p12)	T>C	CALCOCO2 : Missense Variant	Crohn's Disease	23624108	rs2303015
NIPSNAP1	Selective autophagy receptor	chr22:29581329 (GRCh38.p12)	G>C	NIPSNAP1 : 2KB Upstream Variant	Breast Cancer	29059683	rs183421746
NPC1	Lysosomal degradation	chr18:23552736 (GRCh38.p12)	C>G / C>T	NPC1 : Intron Variant	Niemann-Pick Disease, Type C	28167839	rs1055204017
NPC1	Lysosomal degradation	chr18:23560273-23560277 (GRCh38.p12)	delA	NPC1 : Frameshift Variant	Niemann-Pick Disease, Type C	27959697	rs1057518711
NPC1	Lysosomal degradation	chr18:23556527 (GRCh38.p12)	G>A	NPC1 : Stop Gained	Niemann-Pick Disease, Type C	27549128	rs1474434210
NPC1	Lysosomal degradation	chr18:23539826 (GRCh38.p12)	G>A	NPC1 : Missense Variant	Niemann-Pick Disease, Type C	27549128	rs753768576
NPC1	Lysosomal degradation	chr18:23556358 (GRCh38.p12)	C>T	NPC1 : Missense Variant	Niemann-Pick Disease, Type C	26981555	rs139751448
NPC1	Lysosomal degradation	chr18:23539447 (GRCh38.p12	G>A	NPC1 : Missense Variant	Niemann-Pick Disease, Type C	26981555	rs143124972
NPC1	Lysosomal degradation	chr18:23536811 (GRCh38.p12	G>A	NPC1 : Missense Variant	Niemann-Pick Disease, Type C	26981555	rs28942104
NPC1	Lysosomal degradation	chr18:23538610-23538611 (GRCh38.p12	delCT	NPC1 : Frameshift Variant	Niemann-Pick Disease, Type C	26830282	rs756815030
NPC1	Lysosomal degradation	chr18:23534475-23534476 (GRCh38.p12)	delC	NPC1 : Frameshift Variant	Niemann-Pick Disease, Type C	28222799	rs758231839
NPC1	Lysosomal degradation	chr18:23544987-23544990 (GRCh38.p12)	delC	NPC1 : Frameshift Variant	Niemann-Pick Disease, Type C	28167839	rs886042270
NPC1	Lysosomal degradation	chr18:23538564 (GRCh38.p12)	G>C	NPC1 : Missense Variant	Niemann-Pick Disease, Type C	31506030	rs80358257
NPC1	Lysosomal degradation	chr18:23538609 (GRCh38.p12)	C>A / C>G / C>T	NPC1 : Missense Variant	Niemann-Pick Disease, Type C	31506030	rs80358254
NPC1	Lysosomal degradation	chr18:23536736 (GRCh38.p12	A>G	NPC1 : Missense Variant	Niemann-Pick Disease, Type C	31506030	rs80358259
NPC1	Lysosomal degradation	chr18:23538572 (GRCh38.p12)	G>A	NPC1 : Missense Variant	Niemann-Pick Disease, Type C	30119649	rs150334966
NPC1	Lysosomal degradation	chr18:23544402 (GRCh38.p12)	G>A	NPC1 : Missense Variant	Niemann-Pick Disease, Type C	28130309	rs1555634422
NPC1	Lysosomal degradation	chr18:23539878 (GRCh38.p12)	C>T	NPC1 : Missense Variant	Niemann-Pick Disease, Type C	28802248	rs768999208
NPC1	Lysosomal degradation	chr18:23536736 (GRCh38.p12)	A>G	NPC1 : Missense Variant	Niemann-Pick Disease, Type C	27923633	rs80358259
NPC2	Lysosomal degradation	chr14:74486386 (GRCh38.p12)	G>A	NPC2 : Stop Gained	Niemann-Pick Disease Type C	20301473	rs80358262
NPC2	Lysosomal degradation	chr14:74486378 (GRCh38.p12)	G>T	NPC2 : Stop Gained	Niemann-Pick Disease Type C	28095804	rs80358263
NPC2	Lysosomal degradation	chr14:74484426 (GRCh38.p12)	C>A / C>T	NPC2 : Stop Gained	Niemann-Pick Disease Type C	11567215	rs80358266
NPC2	Lysosomal degradation	chr14:74486324 (GRCh38.p12)	C>T	NPC2 : Intron Variant	Niemann-Pick Disease Type C	11567215	rs80358268
NPC2	Lysosomal degradation	chr14:74484579 (GRCh38.p12)	A>G	NPC2 : Missense Variant	Niemann-Pick Disease Type C	15937921	rs11694
NPC2	Lysosomal degradation	chr14:74486404 (GRCh38.p12)	C>T	NPC2 : Missense Variant	Niemann-Pick Disease Type C	15937921	rs80358261
NPC2	Lysosomal degradation	chr14:74484483 (GRCh38.p12)	A>G	NPC2 : Missense Variant	Niemann-Pick Disease Type C	15937921	rs80358264
NPC2	Lysosomal degradation	chr14:74484420 (GRCh38.p12)	G>A	NPC2 : Missense Variant	Niemann-Pick Disease Type C	17470133	rs104894458
NUFIP1	Selective autophagy receptor	chr13:44901447 (GRCh38.p12)	G>A	Unknown	Asthma	25918132	rs114280567
OPTN	Selective autophagy receptor	chr10:13125989 (GRCh38.p12)	C>G / C>T	OPTN : Stop Gained	Amyotrophic lateral sclerosis	20428114	rs267606928
OPTN	Selective autophagy receptor	chr10:13132098 (GRCh38.p12)	A>G	OPTN : Missense Variant	Amyotrophic lateral sclerosis	20428114	rs267606929
OPTN	Selective autophagy receptor	chr10:13109270 (GRCh38.p12)	G>A	OPTN : Missense Variant	Primary open-angle glaucoma	11834836	rs28939688
OPTN	Selective autophagy receptor	chr10:13113726 (GRCh38.p12)	T>C	OPTN : Intron Variant	Paget's disease of the bone	20436471	rs1561570
OPTN	Selective autophagy receptor	chr10:13109224 (GRCh38.p12)	G>A / G>C	OPTN : Synonymous Variant	Paget's disease of the bone	28993189	rs2234968
PHB2	Selective autophagy receptor	chr12:6965202 (GRCh38.p12)	G>A / G>C	PHB2 : 500B Downstream Variant	Bisphosphonate-Associated Osteonecrosis of the Jaw	22267851	rs11064477
PLEKHM1	Autophagosome-lysosome fusion	chr17:45477899 (GRCh38.p12)	C>G / C>T	PLEKHM1 : Splice Donor Variant	Osteopetrosis	17404618	rs786205055
PLEKHM1	Autophagosome-lysosome fusion	chr17:45436075 (GRCh38.p12)	C>T	PLEKHM1 : Non Coding Transcript Variant	Parkinson's disease	20070850	rs11012
PLEKHM1	Autophagosome-lysosome fusion	chr17:45486856 (GRCh38.p12)	T>G	PLEKHM1 : Intron Variant	Alopecia	28196072	rs144733372
PLEKHM1	Autophagosome-lysosome fusion	chr17:45486856 (GRCh38.p12)	T>G	PLEKHM1 : Intron Variant	Unipolar Depression	29559929	rs144733372
PLEKHM1	Autophagosome-lysosome fusion	chr17:45486856 (GRCh38.p12)	T>G	PLEKHM1 : Intron Variant	Major Depressive Disorder	29559929	rs144733372
PLEKHM1	Autophagosome-lysosome fusion	chr17:45489971 (GRCh38.p12)	C>G	PLEKHM1 : Intron Variant	Ovarian cancer	28346442	rs1879586
PLEKHM1	Autophagosome-lysosome fusion	chr17:45451927 (GRCh38.p12)	G>A	PLEKHM1 : Intron Variant	Ovarian cancer	23544013	rs2077606
PLEKHM1	Autophagosome-lysosome fusion	chr17:45439036 (GRCh38.p12)	A>G	PLEKHM1 : Intron Variant	Ovarian cancer	23544013	rs17631303
RAB33B	Autophagosome-lysosome fusion	chr4:139472801 (GRCh38.p12)	T>C	RAB33B : Missense Variant	Smith-Mccort Dysplasia	28127940	rs1085307129
RAB33B	Autophagosome-lysosome fusion	chr4:139472880 (GRCh38.p12)	T>A	RAB33B : Missense Variant	Smith-Mccort Dysplasia	23042644	rs886044716
RAB33B	Autophagosome-lysosome fusion	chr4:139472926 (GRCh38.p12)	C>T	RAB33B : Stop Gained	Smith-Mccort Dysplasia	28127940	rs1085307131
RAB33B	Autophagosome-lysosome fusion	chr4:139454406 (GRCh38.p12)	C>G / C>T	RAB33B : Stop Gained	Smith-Mccort Dysplasia	28127940	rs1085307128
RAB33B	Autophagosome-lysosome fusion	chr4:139454331 (GRCh38.p12)	A>C	RAB33B : Missense Variant	Smith-Mccort Dysplasia	22652534	rs587776958
RAB7A	Autophagosome-lysosome fusion	chr3:128807625 (GRCh38.p12)	A>C / A>G	RAB7A : Missense Variant	Charcot-Marie-Tooth disease type 2B	15455439	rs121909080
RAB7A	Autophagosome-lysosome fusion	chr3:128806576 (GRCh38.p12)	C>T	RAB7A : Missense Variant	Charcot-Marie-Tooth disease type 2B	12545426	rs121909078
RAB7A	Autophagosome-lysosome fusion	chr3:128807627 (GRCh38.p12)	G>A	RAB7A : Missense Variant	Charcot-Marie-Tooth disease type 2B	12545426	rs121909079
RAB7A	Autophagosome-lysosome fusion	chr3:128807614 (GRCh38.p12)	G>C	RAB7A : Missense Variant	Charcot-Marie-Tooth disease type 2B	17060578	rs121909081
RTN3	Selective autophagy receptor	chr11:63719914 (GRCh38.p12)	T>A / T>C / T>G	RTN3 : Missense Variant	Malaria	24934404; 23144702	rs542998
SGSH	Lysosomal degradation	chr17:80213815 (GRCh38.p12)	C>A / C>T	SGSH : Missense Variant	Mucopolysaccharidosis type IIIA (Sanfilippo syndrome type A)	28921412	rs104894635
SGSH	Lysosomal degradation	chr17:80217084 (GRCh38.p12)	G>A / G>C	SGSH : Missense Variant	Mucopolysaccharidosis type IIIA (Sanfilippo syndrome type A)	15542396	rs104894637
SGSH	Lysosomal degradation	chr17:80213876 (GRCh38.p12)	A>G	SGSH : Missense Variant	Mucopolysaccharidosis type IIIA (Sanfilippo syndrome type A)	21204211	rs1057521801
SGSH	Lysosomal degradation	chr17:80212128 (GRCh38.p12)	A>G	SGSH : Missense Variant	Mucopolysaccharidosis type IIIA (Sanfilippo syndrome type A)	26787381	rs138504221
SGSH	Lysosomal degradation	chr17:80213852 (GRCh38.p12)	G>A / G>C	SGSH : Stop Gained	Mucopolysaccharidosis type IIIA (Sanfilippo syndrome type A)	21204211	rs374621913
SGSH	Lysosomal degradation	chr17:80210881-80210882 (GRCh38.p12)	delG	SGSH : Frameshift	Mucopolysaccharidosis type IIIA (Sanfilippo syndrome type A)	22976768	rs770947426
SGSH	Lysosomal degradation	chr17:80210826 (GRCh38.p12)	delC	SGSH : Frameshift	Mucopolysaccharidosis type IIIA (Sanfilippo syndrome type A)	24875751	rs777956287
SGSH	Lysosomal degradation	chr17:80210934-80210935 (GRCh38.p12)	dupG	SGSH : Frameshift	Mucopolysaccharidosis type IIIA (Sanfilippo syndrome type A)	22976768	rs778700037
SGSH	Lysosomal degradation	chr17:80214672 (GRCh38.p12)	C>T	SGSH : Missense Variant	Mucopolysaccharidosis type IIIA (Sanfilippo syndrome type A)	9744479	rs104894638
SGSH	Lysosomal degradation	chr17:80210856 (GRCh38.p12)	C>A / C>G / C>T	SGSH : Stop Gained	Mucopolysaccharidosis type IIIA (Sanfilippo syndrome type A)	12702166	rs104894640
SGSH	Lysosomal degradation	chr17:80214738 (GRCh38.p12)	G>A	SGSH : Missense Variant	Mucopolysaccharidosis type IIIA (Sanfilippo syndrome type A)	12702166	rs104894642
SGSH	Lysosomal degradation	chr17:80214218 (GRCh38.p12)	C>G / C>T	SGSH : Missense Variant	Mucopolysaccharidosis type IIIA (Sanfilippo syndrome type A)	15637719	rs104894643
SGSH	Lysosomal degradation	chr17:80217061 (GRCh38.p12)	G>A	SGSH : Missense Variant	Mucopolysaccharidosis type IIIA (Sanfilippo syndrome type A)	9401012	rs104894636
SGSH	Lysosomal degradation	chr17:80210663 (GRCh38.p12)	C>T	SGSH : Missense Variant	Mucopolysaccharidosis type IIIA (Sanfilippo syndrome type A)	12702166	rs104894641
SGSH	Lysosomal degradation	chr17:80212128 (GRCh38.p12)	A>G	SGSH : Missense Variant	Mucopolysaccharidosis type IIIA (Sanfilippo syndrome type A)	21061399	rs138504221
SGSH	Lysosomal degradation	chr17:80213815 (GRCh38.p12)	C>A / C>T	SGSH : Missense Variant	Mucopolysaccharidosis type IIIA (Sanfilippo syndrome type A)	9700599	rs104894635
SLC17A5	Lysosomal degradation	chr6:73615418-73615419 (GRCh38.p12)	delTA	SLC17A5 : Frameshift	Sialic acid storage diseases (SASDs)	10947946	rs386833987
SLC17A5	Lysosomal degradation	chr6:73635385-73635400 (GRCh38.p12)	delTTTCTTAA(TGA)2A	SLC17A5 : Inframe Deletion	Sialic acid storage diseases (SASDs)	15805149	rs386833994
SLC17A5	Lysosomal degradation	chr6:73638492 (GRCh38.p12)	delG	SLC17A5 : Frameshift	Sialic acid storage diseases (SASDs)	15805149	rs727504156
SLC17A5	Lysosomal degradation	chr6:73638477 (GRCh38.p12)	T>C	SLC17A5 : Missense Variant	Sialic acid storage diseases (SASDs)	10581036	rs119491109
SLC17A5	Lysosomal degradation	chr6:73615425 (GRCh38.p12)	G>A / G>C	SLC17A5 : Missense Variant	Sialic acid storage diseases (SASDs)	10581036	rs119491110
SLC17A5	Lysosomal degradation	chr6:73641810 (GRCh38.p12)	T>A / T>C	SLC17A5 : Stop Gained	Sialic acid storage diseases (SASDs)	16170568	rs80338795
SLC17A5	Lysosomal degradation	chr6:73644583 (GRCh38.p12)	G>A	SLC17A5 : Missense Variant	Sialic acid storage diseases (SASDs)	21781115	rs80338794
SNAP29	Autophagosome-lysosome fusion	chr22:20881101 (GRCh38.p12)	dupA	SNAP29 : Frameshift Variant	Cednik syndrome	21073448	rs387907363
SNAP29	Autophagosome-lysosome fusion	chr22:20859330-20859333 (GRCh38.p12)	delG	SNAP29 : Frameshift Variant	Cednik syndrome	25958742	rs869312906
SPG11	Autophagosome-lysosome fusion	chr15:44620234-44620235 (GRCh38.p12)	delG	SPG11 : Frameshift Variant	Spastic Paraplegia	17322883	rs1085307097
SPG11	Autophagosome-lysosome fusion	chr15:44573652 (GRCh38.p12)	G>A / G>C	SPG11 : Stop Gained	Spastic Paraplegia	17322883	rs118203963
SPG11	Autophagosome-lysosome fusion	chr15:44651862 (GRCh38.p12)	C>T	SPG11 : Stop Gained	Spastic Paraplegia	23443022	rs140385286
SPG11	Autophagosome-lysosome fusion	chr15:44584057 (GRCh38.p12)	G>A	SPG11 : Stop Gained	Spastic Paraplegia	18717728	rs141848292
SPG11	Autophagosome-lysosome fusion	chr15:44572682 (GRCh38.p12)	C>A	SPG11 : Splice Donor Variant	Spastic Paraplegia	26556829	rs1555447432
SPG11	Autophagosome-lysosome fusion	chr15:44657230-44657231 (GRCh38.p12)	delAT	SPG11 : Frameshift Variant	Spastic Paraplegia	28832565	rs312262720
SPG11	Autophagosome-lysosome fusion	chr15:44657094 (GRCh38.p12)	C>T	SPG11 : Splice Donor Variant	Spastic Paraplegia	19105190	rs312262721
SPG11	Autophagosome-lysosome fusion	chr15:44651744-44651746 (GRCh38.p12)	delT	SPG11 : Frameshift Variant	Spastic Paraplegia	19196735	rs312262722
SPG11	Autophagosome-lysosome fusion	chr15:44626429 (GRCh38.p12)	G>A / G>T	SPG11 : Stop Gained	Spastic Paraplegia	20390432	rs312262737
SPG11	Autophagosome-lysosome fusion	chr15:44620189 (GRCh38.p12)	C>A	SPG11 : Splice Donor Variant	Spastic Paraplegia	22154821	rs312262749
SPG11	Autophagosome-lysosome fusion	chr15:44613500-44613507 (GRCh38.p12)	delT / dupT	SPG11 : Frameshift Variant	Spastic Paraplegia	27084228	rs312262752
SPG11	Autophagosome-lysosome fusion	chr15:44584223-44584226 (GRCh38.p12)	delCT	SPG11 : Frameshift Variant	Spastic Paraplegia	18337587	rs312262764
SPG11	Autophagosome-lysosome fusion	chr15:44570551-44570552 (GRCh38.p12)	delC	SPG11 : Frameshift Variant	Spastic Paraplegia	17322883	rs312262779
SPG11	Autophagosome-lysosome fusion	chr15:44565954 (GRCh38.p12)	A>C / A>G	SPG11 : Missense Variant	Spastic Paraplegia	28554332	rs371334506
SPG11	Autophagosome-lysosome fusion	chr15:44660589-44660599 (GRCh38.p12)	delCTGTTACGAG	SPG11 : Frameshift Variant	Spastic Paraplegia	27217339	rs747220413
SPG11	Autophagosome-lysosome fusion	chr15:44564698 (GRCh38.p12)	C>G / C>T	SPG11 : Missense Variant	Spastic Paraplegia	19105190	rs764647588
SPG11	Autophagosome-lysosome fusion	chr15:44657182 (GRCh38.p12)	G>T	SPG11 : Stop Gained	Spastic Paraplegia	27217339	rs765477482
SPG11	Autophagosome-lysosome fusion	chr15:44610918 (GRCh38.p12)	insGGGA	SPG11 : Frameshift Variant	Spastic Paraplegia	18079167	rs767798272
SQSTM1	Selective autophagy receptor	chr5:179836494 (GRCh38.p12)	dupT	SQSTM1 : Stop Gained	Paget's disease of the bone	12374763	rs796051869
SQSTM1	Selective autophagy receptor	chr5:179833783 (GRCh38.p12)	G>A	SQSTM1 : Splice Donor Variant	Amyotrophic lateral sclerosis	23417734	rs796051870
SQSTM1	Selective autophagy receptor	chr5:179825183-179825188 (GRCh38.p12)	delGAA	SQSTM1 : Inframe Deletion	Amyotrophic lateral sclerosis	22084127	rs796052214
SQSTM1	Selective autophagy receptor	chr5:179820938 (GRCh38.p12)	T>A	SQSTM1 : Initiator Codon Variant	Neurodegeneration	27545679	rs886039780
SQSTM1	Selective autophagy receptor	chr5:179836445 (GRCh38.p12	C>T	SQSTM1 : Missense Variant	Paget's disease of the bone	11992264; 12374763; 26713335	rs104893941
SQSTM1	Selective autophagy receptor	chr5:179821034 (GRCh38.p12)	C>G / C>T	SQSTM1 : Missense Variant	Parkinson's disease	26836416	rs200396166
SQSTM1	Selective autophagy receptor	chr5:179833783 (GRCh38.p12)	G>A	SQSTM1 : Splice Donor Variant	Amyotrophic lateral sclerosis	22084127	rs796051870
SQSTM1	Selective autophagy receptor	chr5:179833777 (GRCh38.p12)	C>T	SQSTM1 : Missense Variant	Frontotemporal dementia	24042580	rs776749939
SQSTM1	Selective autophagy receptor	chr5:179833660 (GRCh38.p12)	C>T	SQSTM1 : Missense Variant	Frontotemporal dementia	27554286	rs772889843
SQSTM1	Selective autophagy receptor	chr5:179825183-179825188 (GRCh38.p12)	delGAA	SQSTM1 : Inframe Deletion	Atypical apraxia of speech	25114083	rs796052214
SQSTM1	Selective autophagy receptor	chr5:179825184 (GRCh38.p12)	A>G	SQSTM1 : Missense Variant	Sporadic inclusion body myositis	27594680	rs11548633
SQSTM1	Selective autophagy receptor	chr5:179833669 (GRCh38.p12)	G>C	SQSTM1 : Missense Variant	Frontotemporal dementia	27554286	rs1355424687
STX17	Autophagosome-lysosome fusion	chr9:99961410 (GRCh38.p12)	C>A / C>G / C>T	STX17 : Intron Variant	Alopecia	20596022	rs10760706
STX7	Autophagosome-lysosome fusion	chr6:132472372 (GRCh38.p12)	T>G	STX7 : Missense Variant	Neuronal heterotopia	26395554	rs864309676
TAX1BP1	Selective autophagy receptor	chr7:27787484 (GRCh38.p12)	T>A	TAX1BP1 : Missense Variant	Head and neck cancer	20549079	rs11540483
TAX1BP1	Selective autophagy receptor	chr7:27745330 (GRCh38.p12)	G>A	TAX1BP1 : Intron Variant	Hypospadias	25108383	rs10214930
TECPR2	Membrane elongation	chr14:102432030 (GRCh38.p12)	delT	TECPR2 : Frameshift Variant	Spastic Paraplegia	26542466	rs750908377
TECPR2	Membrane elongation	chr14:102452403 (GRCh38.p12)	delT	TECPR2 : Frameshift Variant	Spastic Paraplegia	26542466	rs751970061
TOLLIP	Selective autophagy receptor	chr11:1288726 (GRCh38.p12)	C>A / C>T	TOLLIP : Synonymous Variant	Leishmaniasis	26107286	rs3750920
TOLLIP	Selective autophagy receptor	chr11:1302334 (GRCh38.p12)	C>T	TOLLIP : Intron Variant	Leishmaniasis	26107286	rs5743899
TOLLIP	Selective autophagy receptor	chr11:1288726 (GRCh38.p12)	C>A / C>T	TOLLIP : Synonymous Variant	Leprosy	24294608	rs3750920
TOLLIP	Selective autophagy receptor	chr11:1288726 (GRCh38.p12)	C>A / C>T	TOLLIP : Synonymous Variant	Malaria	28288644	rs3750920
TOLLIP	Selective autophagy receptor	chr11:1288726 (GRCh38.p12)	C>A / C>T	TOLLIP : Synonymous Variant	Tuberculosis	22778396	rs3750920
TOLLIP	Selective autophagy receptor	chr11:1288726 (GRCh38.p12)	C>A / C>T	TOLLIP : Synonymous Variant	Idiopathic pulmonary fibrosis	26331942	rs3750920
TOLLIP	Selective autophagy receptor	chr11:1280752 (GRCh38.p12)	T>C	TOLLIP : Intron Variant	Leprosy	26610735	rs3793964
TOLLIP	Selective autophagy receptor	chr11:1307121 (GRCh38.p12)	G>A / G>C	TOLLIP : Intron Variant	Septicemia	21219635	rs5743867
TOLLIP	Selective autophagy receptor	chr11:1307121 (GRCh38.p12)	G>A / G>C	TOLLIP : Intron Variant	Tuberculosis	29924447	rs5743867
TOLLIP	Selective autophagy receptor	chr11:1304599 (GRCh38.p12)	T>C	TOLLIP : Intron Variant	Idiopathic pulmonary fibrosis	30635297	rs5743890
TOLLIP	Selective autophagy receptor	chr11:1291476 (GRCh38.p12)	C>G	TOLLIP : Intron Variant	Idiopathic pulmonary fibrosis	24429156	rs111521887
TOLLIP	Selective autophagy receptor	chr11:1275419 (GRCh38.p12)	G>A	TOLLIP : Non Coding Transcript Variant	Fibrotic idiopathic interstitial pneumonia	23583980	rs3168046
TOLLIP	Selective autophagy receptor	chr11:1288726 (GRCh38.p12)	C>A / C>T	TOLLIP : Synonymous Variant	Fibrotic idiopathic interstitial pneumonia	23583980	rs3750920
TOLLIP	Selective autophagy receptor	chr11:1280752 (GRCh38.p12)	T>C	TOLLIP : Intron Variant	Fibrotic idiopathic interstitial pneumonia	23583980	rs3793964
TOLLIP	Selective autophagy receptor	chr11:1279176 (GRCh38.p12)	C>T	TOLLIP : Intron Variant	Fibrotic idiopathic interstitial pneumonia	23583980	rs3829223
TOLLIP	Selective autophagy receptor	chr11:1275007 (GRCh38.p12)	A>G	TOLLIP : Non Coding Transcript Variant	Fibrotic idiopathic interstitial pneumonia	23583980	rs5744034
ULK1	Autophagy initiation	chr12:131914520 (GRCh38.p12)	T>G	ULK1 : Intron Variant	Crohn's Disease	21560199	rs12303764
ULK1	Autophagy initiation	chr12:131893588 (GRCh38.p12)	G>A / G>C	ULK1 : 2KB Upstream Variant	Crohn's Disease	22536218	rs10902469
ULK1	Autophagy initiation	chr12:131902684 (GRCh38.p12)	T>A / T>C	ULK1 : Intron Variant	Crohn's Disease	22536218	rs7488085
ULK1	Autophagy initiation	chr12:131920888 (GRCh38.p12)	G>A / G>C / G>T	ULK1 : Intron Variant	Tuberculosis	27485354	rs12297124
ULK1	Autophagy initiation	chr12:131922121 (GRCh38.p12)	G>C	ULK1 : Non Coding Transcript Variant	Tuberculosis	30808462	rs7138581
ULK1	Autophagy initiation	chr12:131922544 (GRCh38.p12)	A>G	ULK1 : Non Coding Transcript Variant	Tuberculosis	30808462	rs9481
ULK1	Autophagy initiation	chr12:131897375 (GRCh38.p12)	T>C	ULK1 : Intron Variant	Ankylosing spondylitis	28667165	rs9652059
ULK2	Autophagy initiation	chr17:19897081 (GRCh38.p12)	C>T	Unknown	Asparaginase-associated pancreatitis	27451978	Rs281366
UVRAG	Membrane nucleation	chr11:75835646 (GRCh38.p12)	A>C / A>G	UVRAG : Intron Variant	Multiple sclerosis treatment	28569182	rs80191572
UVRAG	Membrane nucleation	chr11:75926523 (GRCh38.p12)	C>G / C>T	UVRAG : Intron Variant	Rheumatoid arthritis	24649081	rs7111334
UVRAG	Membrane nucleation	chr11:75813751 (GRCh38.p12)	C>T	UVRAG : 2KB Upstream Variant	Non-segmental vitiligo	20163458	rs1458836
UVRAG	Membrane nucleation	chr11:75829541 (GRCh38.p12)	A>C / A>G	UVRAG : Intron Variant	Non-segmental vitiligo	20163458	rs7933235
VAMP8	Autophagosome-lysosome fusion	chr2:85581859 (GRCh38.p12)	T>C / T>G	VAMP8 : 3 Prime UTR Variant	Cerebrovascular accident	19752551	rs1010
VAMP8	Autophagosome-lysosome fusion	chr2:85581859 (GRCh38.p12)	T>C / T>G	VAMP8 : 3 Prime UTR Variant	Tuberculosis	30945947	rs1010
VAMP8	Autophagosome-lysosome fusion	chr2:85581859 (GRCh38.p12)	T>C / T>G	VAMP8 : 3 Prime UTR Variant	Coronary artery disease	18073581	rs1010
VAMP8	Autophagosome-lysosome fusion	chr2:85567174 (GRCh38.p12)	T>A / T>C	Unknown	Prostate cancer	21743467	rs10187424
VAMP8	Autophagosome-lysosome fusion	chr2:85578945 (GRCh38.p12)	T>C / T>G	VAMP8 : Intron Variant	Prostate cancer	26034056	rs3731827
VPS33A	Autophagosome-lysosome fusion	chr12:122232917 (GRCh38.p12)	G>A	VPS33A : Missense Variant	MPS-like disorder	28013294	rs767748011
VPS34/PIK3C3	Membrane nucleation	chr18:41982266 (GRCh38.p12)	G>A	PIK3C3 : Intron Variant	Pancreatic cancer	32775006	rs76692125
VPS34/PIK3C3	Membrane nucleation	chr18:41974975 (GRCh38.p12)	G>A / G>C / G>T	PIK3C3 : Intron Variant	Esophageal squamous cell carcinoma	15805246; 18649358	rs52911
VPS34/PIK3C3	Membrane nucleation	chr18:37634043 (GRCh38.p12)	A>G / A>T	Unknown	Gastric cancer	30900102	rs2162440
VPS34/PIK3C3	Membrane nucleation	chr18:41954860 (GRCh38.p12)	C>T	PIK3C3 : 2KB Upstream Variant	Schizophrenia	15121481; 15814194; 15949671; 18420347; 22399091	rs3813065
VPS34/PIK3C3	Membrane nucleation	chr18:41954860 (GRCh38.p12)	C>T	PIK3C3 : 2KB Upstream Variant	Systemic lupus erythematosus	20671926	rs3813065
VPS41	Autophagosome-lysosome fusion	chr7:38899654 (GRCh38.p12)	C>T	VPS41 : Intron Variant	Major Depressive Disorder	29942085	rs10274968
WDFY3/ALFY	Membrane nucleation	chr4:84715350 (GRCh38.p12)	G>A	WDFY3 : Missense Variant	Microcephaly	27008544	rs1553924800
WDFY3/ALFY	Membrane nucleation	chr4:84811016 (GRCh38.p12)	C>A / C>G	WDFY3 : Intron Variant	Malignant neoplasm of oropharynx	27749845	rs6847067
WIPI2	Membrane nucleation	chr7:5212643 (GRCh38.p12)	C>A / C>T	WIPI2 : Intron Variant	Osteoporosis	29518117	rs4720530
WIPI3/WDR45B	Membrane nucleation	chr17:82619074 (GRCh38.p12)	G>A	WDR45B : Stop Gained	Neurodevelopmental disorder	28503735	rs786205510
WIPI3/WDR45B	Membrane nucleation	chr17:82617303 (GRCh38.p12)	G>A	WDR45B : Stop Gained	Neurodevelopmental disorder	28503735	rs1555647262
WIPI4/WDR45	Membrane nucleation	chrX:49078077 (GRCh38.p12)	G>A	WDR45 : Stop Gained	Rett syndrome	24621584	rs886041382
WIPI4/WDR45	Membrane nucleation	chrX:49078077 (GRCh38.p12)	G>A	WDR45 : Stop Gained	Neurodegeneration with brain iron accumulation	25592411	rs886041382
WIPI4/WDR45	Membrane nucleation	chrX:49075866 (GRCh38.p12)	C>G	WDR45 : Synonymous Variant	β-propeller protein-associated neurodegeneration (BPAN)	23435086	rs387907330
WIPI4/WDR45	Membrane nucleation	chrX:49075947 (GRCh38.p12)	T>C / T>G	WDR45 : Splice Acceptor Variant	Rett syndrome	26790960	rs886041693
WIPI4/WDR45	Membrane nucleation	chrX:49075440-49075447 (GRCh38.p12)	delGAG	WDR45 : Inframe Deletion	Early-onset epileptic encephalopathy	28371320	rs1064793294
YKT6	Autophagosome-lysosome fusion	chr7:44209229 (GRCh38.p12)	G>A / G>C	YKT6 : Intron Variant	Diabetes	30054458	rs2908282
YKT6	Autophagosome-lysosome fusion	chr7:44206672 (GRCh38.p12)	C>T	YKT6 : Intron Variant	Birth Weight and subsequent risk factors	27680694; 31043758	rs138715366
ZFYVE1 / DFCP1	Membrane nucleation	chr14:73017676 (GRCh38.p12)	A>G / A>T	ZFYVE1 : Intron Variant	Tuberculosis	28628665	rs2333021
ZFYVE26	Autophagosome-lysosome fusion	chr14:67754069 (GRCh38.p12)	A>T	ZFYVE26 : Splice Donor Variant	Spastic Paraplegia	19805727	rs1049504575
ZFYVE26	Autophagosome-lysosome fusion	chr14:67797750 (GRCh38.p12)	G>A	ZFYVE26 : Stop Gained	Spastic Paraplegia	24833714	rs1057518016
ZFYVE26	Autophagosome-lysosome fusion	chr14:67782840 (GRCh38.p12)	G>A	ZFYVE26 : Stop Gained	Spastic Paraplegia	18394578	rs118204049
ZFYVE26	Autophagosome-lysosome fusion	chr14:67775866 (GRCh38.p12)	G>A	ZFYVE26 : Stop Gained	Spastic Paraplegia	23733235	rs1214483973
ZFYVE26	Autophagosome-lysosome fusion	chr14:67776358 (GRCh38.p12)	C>A	ZFYVE26 : Intron Variant	Amyotrophic Lateral Sclerosis	24529757	rs12891047
ZFYVE26	Autophagosome-lysosome fusion	chr14:67762276 (GRCh38.p12)	dupA	ZFYVE26 : Frameshift Variant	Spastic Paraplegia	28832565	rs1555394376
ZFYVE26	Autophagosome-lysosome fusion	chr14:67766404 (GRCh38.p12)	C>T	ZFYVE26 : Missense Variant	Breast Cancer	21455500	rs200595749
ZFYVE26	Autophagosome-lysosome fusion	chr14:67807692 (GRCh38.p12)	G>A	ZFYVE26 : Stop Gained	Spastic Paraplegia	19917823	rs200832994
ZFYVE26	Autophagosome-lysosome fusion	chr14:67777729 (GRCh38.p12)	G>A / G>C	ZFYVE26 : Stop Gained	Spastic Paraplegia	27544497	rs558285072
ZFYVE26	Autophagosome-lysosome fusion	chr14:67783217 (GRCh38.p12)	G>T	ZFYVE26 : Stop Gained	Movement Disorders	25497598	rs752283089
ZFYVE26	Autophagosome-lysosome fusion	chr14:67786112 (GRCh38.p12)	A>C	ZFYVE26 : Splice Donor Variant	Spastic Paraplegia	18394578	rs767164213
ZFYVE26	Autophagosome-lysosome fusion	chr14:67793711-67793712 (GRCh38.p12)	delA	ZFYVE26 : Frameshift Variant	Spastic Paraplegia	25497598	rs768176054
ZFYVE26	Autophagosome-lysosome fusion	chr14:67809291 (GRCh38.p12)	T>C	ZFYVE26 : Splice Acceptor Variant	Spastic Paraplegia	18394578	rs769329153
ZFYVE26	Autophagosome-lysosome fusion	chr14:67783020 (GRCh38.p12)	G>A / G>T	ZFYVE26 : Stop Gained	Spastic Paraplegia	24833714	rs774809466
ZFYVE26	Autophagosome-lysosome fusion	chr14:67752520 (GRCh38.p12)	G>A	ZFYVE26 : Stop Gained	Movement Disorders	24267886	rs869312914
ZFYVE26	Autophagosome-lysosome fusion	chr14:67794234 (GRCh38.p12)	G>A / G>C	ZFYVE26 : Stop Gained	Spastic Paraplegia	25497598	rs941230062
ZFYVE26	Autophagosome-lysosome fusion	chr14:67798080 (GRCh38.p12)	G>A / G>T	ZFYVE26 : Stop Gained	Spastic Paraplegia	19805727	rs981804211
